# Supplementary material for: Antioxidant Activity and Discrimination of Organic Apples (Malus domestica Borkh.) Cultivated in the Western Region of Romania: A DPPH· Kinetics–PCA Approach
Source: MDPI journal article supplement (doi:10.3390/plants10091957), 2021-09-19
Supplement: s1 [file s1]

## Supplementary material

# Antioxidant activity and discrimination of organic apples (*Malus domestica* Borkh.) cultivated in the western region of Romania: a DPPH· kinetics – PCA approach

Olimpia Alina Iordănescu <sup>1,†</sup>, Maria Băla <sup>1,†</sup>, Alina Carmen Iuga <sup>1,†</sup>, Dina Gligor (Pane) <sup>2</sup>, Ionuț Dascălu <sup>1,†</sup>, Gabriel Stelian Bujancă <sup>3</sup>, Ioan David <sup>4,\*</sup>, Nicoleta Gabriela Hădărugă <sup>2,4,\*</sup>, Daniel Ioan Hădărugă <sup>2,5</sup>

<sup>1</sup> Department of Horticulture, Banat's University of Agricultural Sciences and Veterinary Medicine "King Michael I of Romania" from Timișoara, Calea Aradului 119, 300645-Timișoara, Romania; olimpia.iordanescu@yahoo.com (O.A.I.); mariabalamonicabala@yahoo.com (M.B.); i\_alievery@yahoo.com (A.C.I.); dascalu\_ionut91@yahoo.com (I.D.)

<sup>2</sup> Doctoral School "Engineering of Vegetable and Animal Resources", Banat's University of Agricultural Sciences and Veterinary Medicine "King Michael I of Romania" from Timișoara, Calea Aradului 119, 300645-Timișoara, Romania; gligor\_dina\_bihor@yahoo.com (D.G.P.)

<sup>3</sup> Department of Food Control, Banat's University of Agricultural Sciences and Veterinary Medicine "King Michael I of Romania" from Timișoara, Calea Aradului 119, 300645 Timișoara, Romania; gabrielbujanca@yahoo.com (G.S.B.)

<sup>4</sup> Department of Food Science, Banat's University of Agricultural Sciences and Veterinary Medicine "King Michael I of Romania" from Timișoara, Calea Aradului 119, 300645 –Timișoara, Romania; neda\_university@yahoo.com (I.D.); nicolethadaruga@usab-tm.ro; nico\_hadaruga@yahoo.com (N.G.H.)

<sup>5</sup> Department of Applied Chemistry, Organic and Natural Compounds Engineering, Polytechnic University of Timișoara, Carol Telbisz 6, 300001 – Timișoara, Romania; daniel.hadaruga@upt.ro (D.I.H.)

\* Correspondence: nico\_hadaruga@yahoo.com (N.G.H.); neda\_university@yahoo.com (I.D.); Tel.: +40-256-277-423

† These authors contributed equally to this work. They are principal authors.

**Citation:** Iordănescu, O.A.; Băla, M.; Iuga, A.C.; Gligor (Pane), D.; Dascălu, I.; Bujancă, G.S.; David, I.; Hădărugă, N.G.; Hădărugă, D.I. Antioxidant activity and discrimination of organic apples (*Malus domestica* Borkh.) cultivated in the western region of Romania: a DPPH· kinetics – PCA approach. *Plants* **2021**, *10*, 1957. <https://doi.org/10.3390/plants10091957>

**Publisher's Note:** MDPI stays neutral with regard to jurisdictional claims in published maps and institutional affiliations.

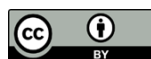

**Copyright:** © 2021 by the author. Licensee MDPI, Basel, Switzerland. This article is an open access article distributed under the terms and conditions of the Creative Commons Attribution (CC BY) license (<http://creativecommons.org/licenses/by/4.0/>).

**Abstract:** Apple (*Malus domestica* Borkh.) is one of the most used fruit for beverages in Romania. The goal of the study was to evaluate the antioxidant activity and discrimination of various parts of organic and non-organic apple varieties cultivated in the western region of Romania using the DPPH· kinetics – PCA (principal component analysis) approach. Organic and non-organic apples have been subjected to solid-liquid ethanol extraction. Core and shell extracts were mixed with DPPH· and spectrophotometrically monitored at 517 nm. Antioxidant activity and mean DPPH· reaction rate at various time ranges reveals significant differences between organic and non-organic samples, as well as apple parts. Organic core and shell extracts had higher antioxidant activities than the corresponding non-organic samples (74.5-96.9% and 61.9-97.2%, respectively 23.5-94.3% and 59.5-95.5%). Significant differences were observed for the DPPH· reaction rate for the first ½ min, especially in the presence of organic core extracts (3.7-4.8 μM/s). The organic samples were well discriminated by DPPH· kinetics – PCA, the most important variables being the DPPH· reaction rate for the first time range. This is the first DPPH· kinetics – PCA approach applied for discriminating between organic and non-organic fruits and can be useful for evaluating the quality of such type of fruits.

**Keywords:** apple; *Malus domestica* Borkh.; antioxidant activity; organic and non-organic orchards; DPPH· kinetics; mean DPPH· reaction rate; principal component analysis discrimination

## 1. Radical scavenging activity of apple extracts

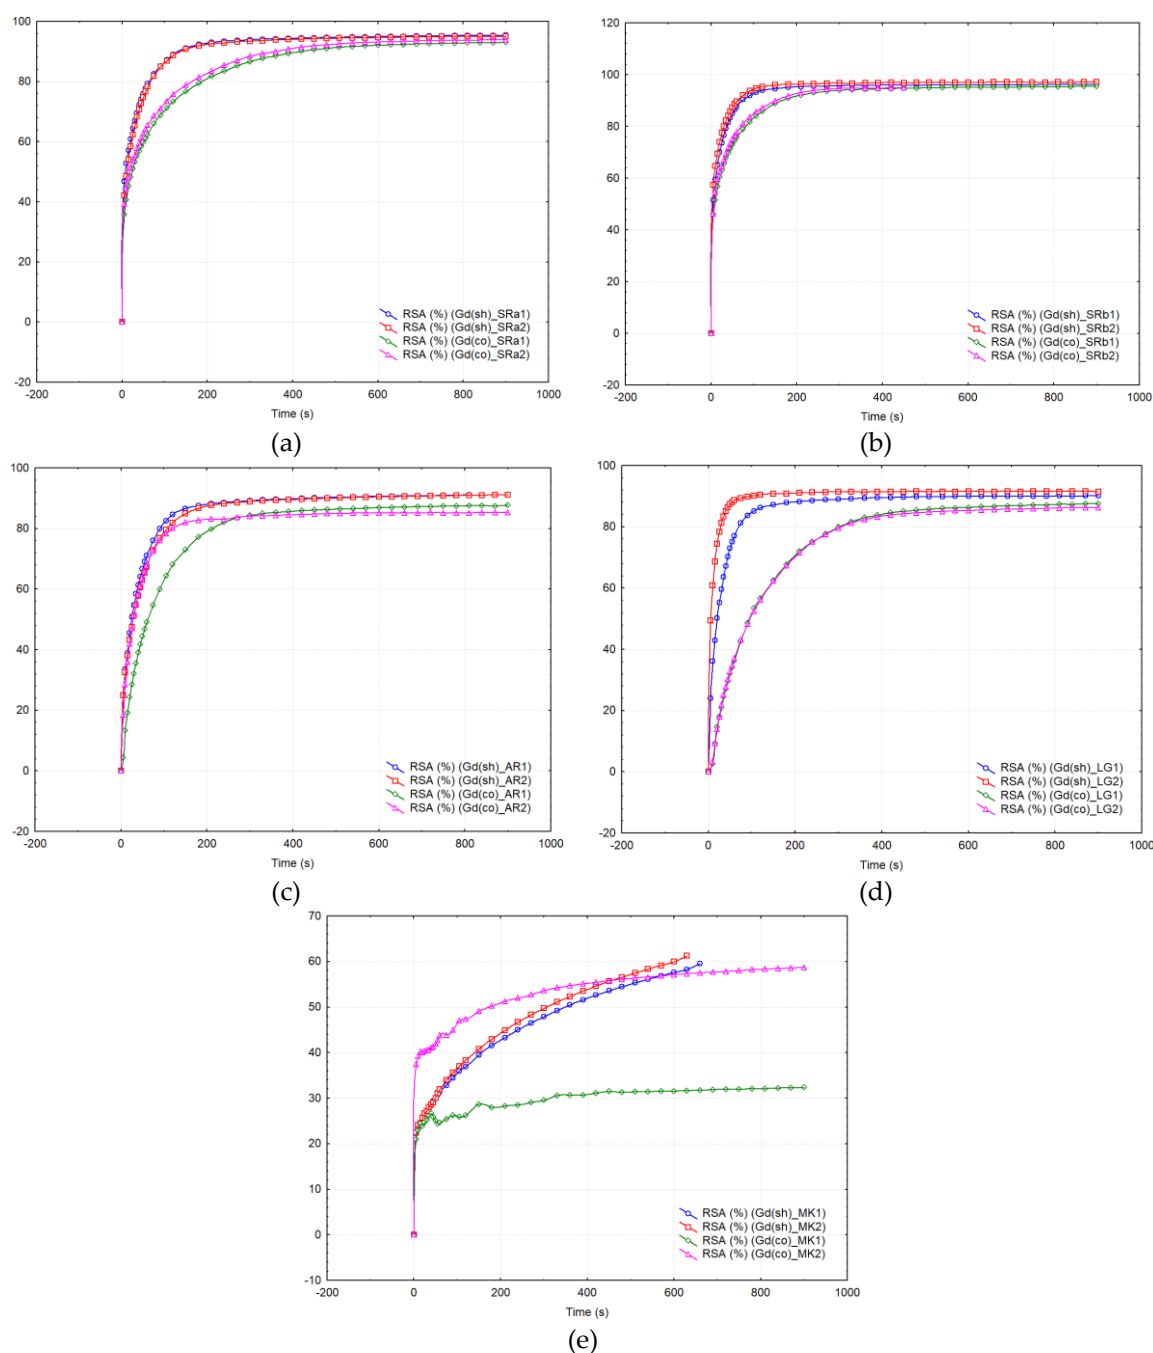

**Figure S1.** Variation of the radical scavenging activity (RSA, %) during the spectrophotometric monitoring for the extracts obtained from the “Golden Delicious” apple varieties in the presence of the DPPH $\cdot$  solution: (a) organic shell and core apple extracts, *Gd(sh)\_SRa* and *Gd(co)\_SRa*; (b) organic shell and core apple extracts, *Gd(sh)\_SRb* and *Gd(co)\_SRb*; (c) non-organic shell and core apple extracts, *Gd(sh)\_AR* and *Gd(co)\_AR*; (d) non-organic shell and core apple extracts, *Gd(sh)\_LG* and *Gd(co)\_LG*; (e) non-organic shell and core apple extracts, *Gd(sh)\_MK* and *Gd(co)\_MK* (all determinations are presented as duplicates “1” and “2”).

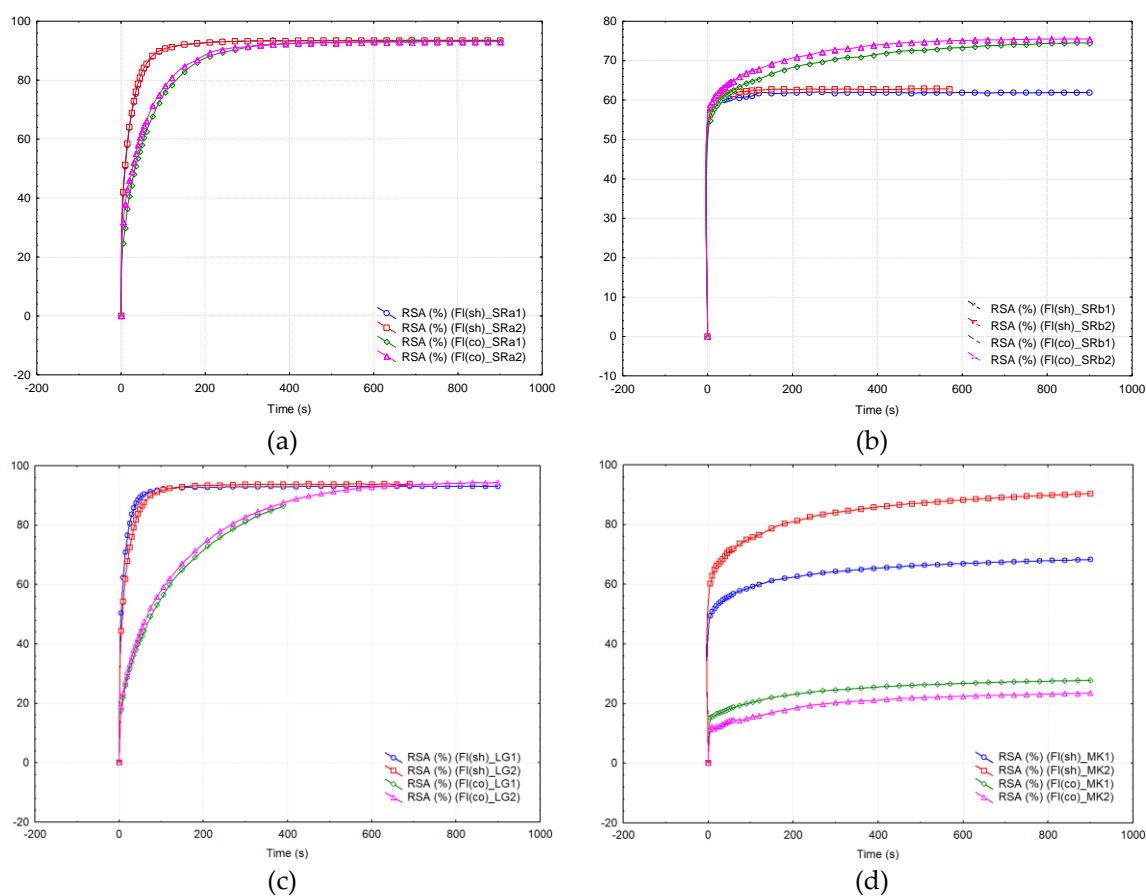

**Figure S2.** Variation of the radical scavenging activity (RSA, %) during the spectrophotometric monitoring for the extracts obtained from the “Florina” apple varieties in the presence of the DPPH $\cdot$  solution: (a) organic shell and core apple extracts, *Fl(sh)\_SRa* and *Fl(co)\_SRa*; (b) organic shell and core apple extracts, *Fl(sh)\_SRb* and *Fl(co)\_SRb*; (c) non-organic shell and core apple extracts, *Fl(sh)\_LG* and *Fl(co)\_LG*; (d) non-organic shell and core apple extracts, *Fl(sh)\_MK* and *Fl(co)\_MK* (all determinations are presented as duplicates “1” and “2”).

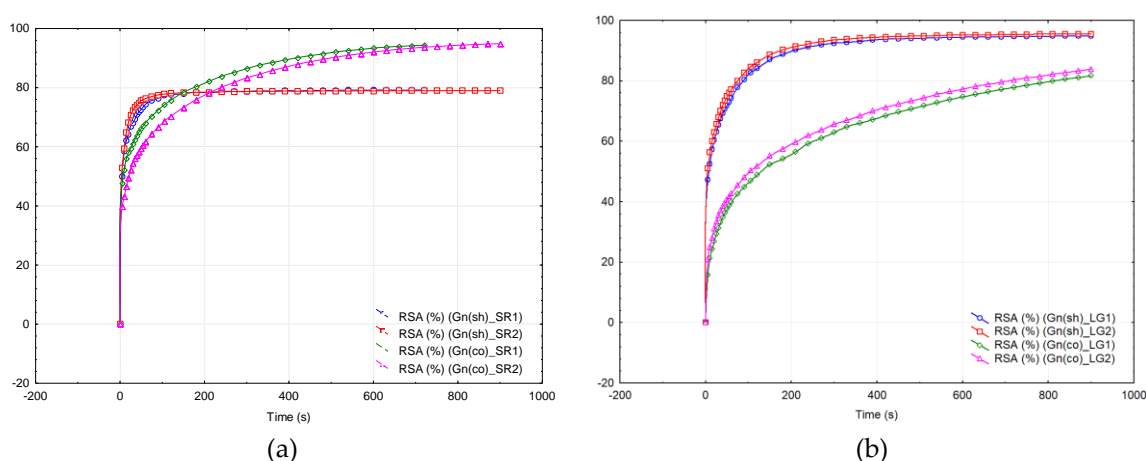

**Figure S3.** Variation of the radical scavenging activity (RSA, %) during the spectrophotometric monitoring for the extracts obtained from the “Generos” apple varieties in the presence of the DPPH $\cdot$  solution: (a) organic shell and core apple extracts, *Gn(sh)\_SR* and *Gn(co)\_SR*; (b) non-organic shell and core apple extracts, *Gn(sh)\_LG* and *Gn(co)\_LG* (all determinations are presented as duplicates “1” and “2”).

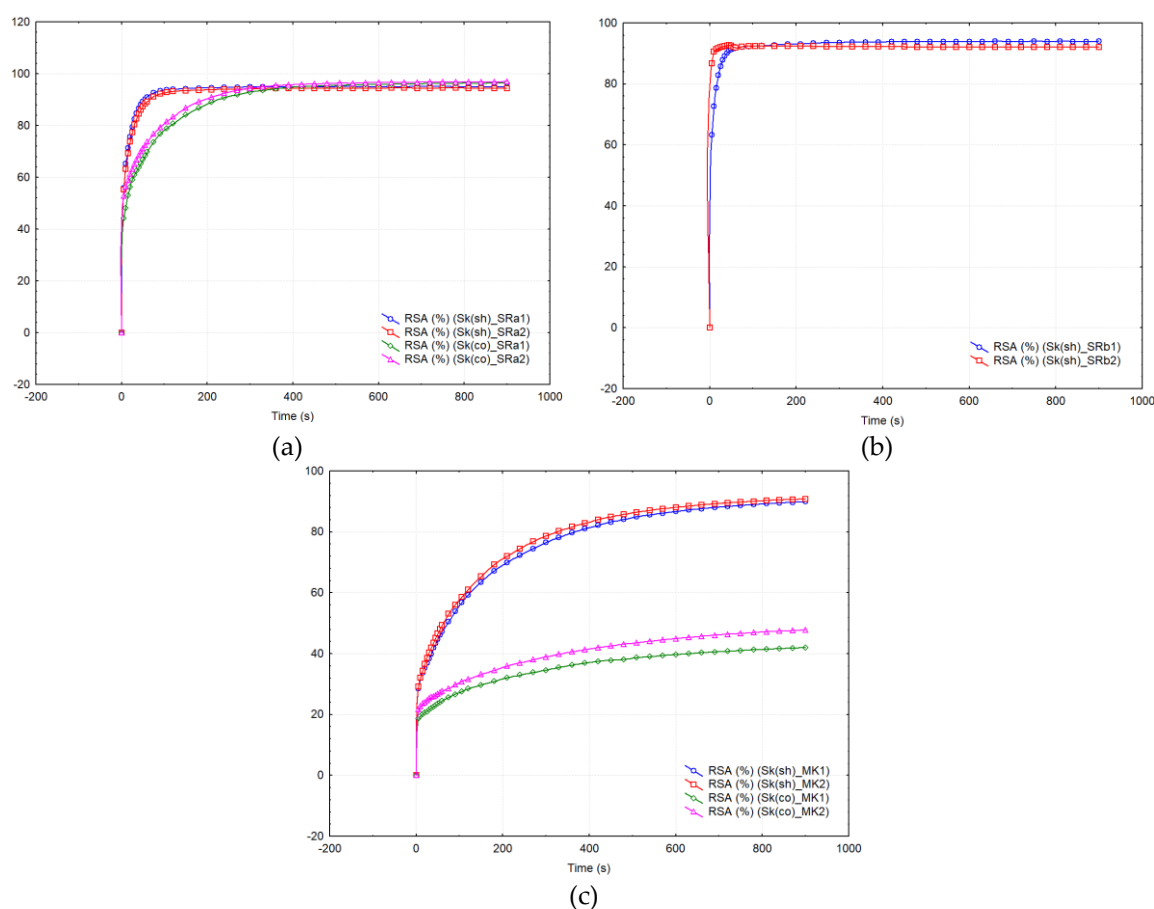

**Figure S4.** Variation of the radical scavenging activity (RSA, %) during the spectrophotometric monitoring for the extracts obtained from the “Starkrimson” apple varieties in the presence of the DPPH $\cdot$  solution: (a) organic shell and core apple extracts, *Sk(sh)\_SRa* and *Sk(co)\_SRa*; (b) organic shell apple extracts, *Sk(sh)\_SRb*; (c) non-organic shell and core apple extracts, *Sk(sh)\_MK* and *Sk(co)\_MK* (all determinations are presented as duplicates “1” and “2”).

**Table S1.** Radical scavenging activity (RSA, %) at various times of monitoring for the standard antioxidant compound solutions (*Rv\_1mM/0.2mM/0.1mM* – resveratrol solutions at concentrations of 1 mM/0.2 mM/0.1 mM; *PG\_0.2mM* – propyl gallate solution at a concentration of 0.2 mM). Values are expressed as mean ( $\pm$  standard deviation, SD).

| Code              | Antioxidant type | RSA (1 min)<br>(%)   | RSA (3 min)<br>(%)   | RSA (5 min)<br>(%)   | RSA (15 min)<br>(%)  |
|-------------------|------------------|----------------------|----------------------|----------------------|----------------------|
| <i>Rv_1mM</i>     | Natural          | 57.97 ( $\pm 0.13$ ) | 68.11 ( $\pm 0.24$ ) | 72.99 ( $\pm 0.41$ ) | 84.17 ( $\pm 0.62$ ) |
| <i>Rv_0.2mM</i>   | Natural          | 48.89 ( $\pm 0.25$ ) | 52.86 ( $\pm 0.22$ ) | 54.86 ( $\pm 0.17$ ) | 59.55 ( $\pm 0.03$ ) |
| <i>Rv_0.1mM</i> * | Natural          | 45.22                | 47.53                | 48.71                | 51.41                |
| <i>PG_0.2mM</i> * | Synthetic        | 67.96                | 73.74                | 76.76                | 82.46                |

\*Single determination.

**Table S2.** Significance *p*-levels from the Tukey HSD test (honestly significant difference) for the antioxidant activity of “Golden Delicious” apple extracts (*RSA* – radical scavenging activity, %, at 1 min; organic shell apple extracts: *Gd(sh)\_SRa* and *Gd(sh)\_SRb*; organic core apple extracts: *Gd(co)\_SRa* and *Gd(co)\_SRb*; non-organic shell apple extracts: *Gd(sh)\_AR*, *Gd(sh)\_LG* and *Gd(sh)\_MK*; non-organic core apple extracts: *Gd(co)\_AR*, *Gd(co)\_LG* and *Gd(co)\_MK*). *p*-level values lower than 0.05 are bolded.

[illegible]

**Table S3.** Significance *p*-levels from the Tukey HSD test (honestly significant difference) for the antioxidant activity of “Golden Delicious” apple extracts (*RSA* – radical scavenging activity, %, at 3 min; organic shell apple extracts: *Gd(sh)\_SRa* and *Gd(sh)\_SRb*; organic core apple extracts: *Gd(co)\_SRa* and *Gd(co)\_SRb*; non-organic shell apple extracts: *Gd(sh)\_AR*, *Gd(sh)\_LG* and *Gd(sh)\_MK*; non-organic core apple extracts: *Gd(co)\_AR*, *Gd(co)\_LG* and *Gd(co)\_MK*). *p*-level values lower than 0.05 are bolded.

[illegible]

**Table S4.** Significance *p*-levels from the Tukey HSD test (honestly significant difference) for the antioxidant activity of “Golden Delicious” apple extracts (*RSA* – radical scavenging activity, %, at 5 min; organic shell apple extracts: *Gd(sh)\_SRa* and *Gd(sh)\_SRb*; organic core apple extracts: *Gd(co)\_SRa* and *Gd(co)\_SRb*; non-organic shell apple extracts: *Gd(sh)\_AR*, *Gd(sh)\_LG* and *Gd(sh)\_MK*; non-organic core apple extracts: *Gd(co)\_AR*, *Gd(co)\_LG* and *Gd(co)\_MK*). *p*-level values lower than 0.05 are bolded.

[illegible]

**Table S5.** Significance *p*-levels from the Tukey HSD test (honestly significant difference) for the antioxidant activity of “Golden Delicious” apple extracts (RSA – radical scavenging activity, %, at 15 min; organic shell apple extracts: *Gd(sh)\_SRa* and *Gd(sh)\_SRb*; organic core apple extracts: *Gd(co)\_SRa* and *Gd(co)\_SRb*; non-organic shell apple extracts: *Gd(sh)\_AR*, *Gd(sh)\_LG* and *Gd(sh)\_MK*; non-organic core apple extracts: *Gd(co)\_AR*, *Gd(co)\_LG* and *Gd(co)\_MK*). *p*-level values lower than 0.05 are bolded.

[illegible]

**Table S6.** Significance *p*-levels from the Tukey HSD test (honestly significant difference) for the antioxidant activity of “Florina” apple extracts (RSA – radical scavenging activity, %, at 1 min; organic shell apple extracts: *Fl(sh)\_SRa* and *Fl(sh)\_SRb*; organic core apple extracts: *Fl(co)\_SRa* and *Fl(co)\_SRb*; non-organic shell apple extracts: *Fl(sh)\_LG* and *Fl(sh)\_MK*; non-organic core apple extracts: *Fl(co)\_LG* and *Fl(co)\_MK*). *p*-level values lower than 0.05 are bolded.

|                   | <i>Fl(sh)_SRa</i> | <i>Fl(co)_SRa</i> | <i>Fl(sh)_SRb</i> | <i>Fl(co)_SRb</i> | <i>Fl(sh)_LG</i> | <i>Fl(co)_LG</i> | <i>Fl(sh)_MK</i> | <i>Fl(co)_MK</i> |
|-------------------|-------------------|-------------------|-------------------|-------------------|------------------|------------------|------------------|------------------|
| <i>Fl(sh)_SRa</i> |                   | <b>0.027098</b>   | <b>0.039373</b>   | <b>0.022688</b>   | 0.983522         | <b>0.000823</b>  | <b>0.026934</b>  | <b>0.000240</b>  |
| <i>Fl(co)_SRa</i> |                   |                   | 0.999054          | 1.000000          | <b>0.011265</b>  | <b>0.048304</b>  | 1.000000         | <b>0.000381</b>  |
| <i>Fl(sh)_SRb</i> |                   |                   |                   | 0.999863          | <b>0.018646</b>  | 0.214254         | 0.999105         | <b>0.001194</b>  |
| <i>Fl(co)_SRb</i> |                   |                   |                   |                   | <b>0.009581</b>  | 0.058291         | 1.000000         | <b>0.000398</b>  |
| <i>Fl(sh)_LG</i>  |                   |                   |                   |                   |                  | <b>0.000544</b>  | <b>0.011203</b>  | <b>0.000239</b>  |
| <i>Fl(co)_LG</i>  |                   |                   |                   |                   |                  |                  | <b>0.048612</b>  | <b>0.004340</b>  |
| <i>Fl(sh)_MK</i>  |                   |                   |                   |                   |                  |                  |                  | <b>0.000381</b>  |
| <i>Fl(co)_MK</i>  |                   |                   |                   |                   |                  |                  |                  |                  |

**Table S7.** Significance *p*-levels from the Tukey HSD test (honestly significant difference) for the antioxidant activity of “Florina” apple extracts (RSA – radical scavenging activity, %, at 3 min; organic shell apple extracts: *Fl(sh)\_SRa* and *Fl(sh)\_SRb*; organic core apple extracts: *Fl(co)\_SRa* and *Fl(co)\_SRb*; non-organic shell apple extracts: *Fl(sh)\_LG* and *Fl(sh)\_MK*; non-organic core apple extracts: *Fl(co)\_LG* and *Fl(co)\_MK*). *p*-level values lower than 0.05 are bolded.

|                   | <i>Fl(sh)_SRa</i> | <i>Fl(co)_SRa</i> | <i>Fl(sh)_SRb</i> | <i>Fl(co)_SRb</i> | <i>Fl(sh)_LG</i> | <i>Fl(co)_LG</i> | <i>Fl(sh)_MK</i> | <i>Fl(co)_MK</i> |
|-------------------|-------------------|-------------------|-------------------|-------------------|------------------|------------------|------------------|------------------|
| <i>Fl(sh)_SRa</i> |                   | 0.922382          | <b>0.026205</b>   | <b>0.030315</b>   | 1.000000         | <b>0.040164</b>  | <b>0.049479</b>  | <b>0.000245</b>  |
| <i>Fl(co)_SRa</i> |                   |                   | 0.076107          | 0.114097          | 0.890435         | 0.153669         | 0.190584         | <b>0.000276</b>  |
| <i>Fl(sh)_SRb</i> |                   |                   |                   | 0.965683          | <b>0.024010</b>  | 0.916234         | 0.863625         | <b>0.003643</b>  |
| <i>Fl(co)_SRb</i> |                   |                   |                   |                   | <b>0.027200</b>  | 0.999992         | 0.999678         | <b>0.000600</b>  |
| <i>Fl(sh)_LG</i>  |                   |                   |                   |                   |                  | <b>0.035951</b>  | <b>0.044213</b>  | <b>0.000244</b>  |
| <i>Fl(co)_LG</i>  |                   |                   |                   |                   |                  |                  | 0.999999         | <b>0.000538</b>  |
| <i>Fl(sh)_MK</i>  |                   |                   |                   |                   |                  |                  |                  | <b>0.000493</b>  |
| <i>Fl(co)_MK</i>  |                   |                   |                   |                   |                  |                  |                  |                  |

**Table S8.** Significance *p*-levels from the Tukey HSD test (honestly significant difference) for the antioxidant activity of “Florina” apple extracts (RSA – radical scavenging activity, %, at 5 min; organic shell apple extracts: *Fl(sh)\_SRa* and *Fl(sh)\_SRb*; organic core apple extracts: *Fl(co)\_SRa* and *Fl(co)\_SRb*; non-organic shell apple extracts: *Fl(sh)\_LG* and *Fl(sh)\_MK*; non-organic core apple extracts: *Fl(co)\_LG* and *Fl(co)\_MK*). *p*-level values lower than 0.05 are bolded.

|                   | <i>Fl(sh)_SRa</i> | <i>Fl(co)_SRa</i> | <i>Fl(sh)_SRb</i> | <i>Fl(co)_SRb</i> | <i>Fl(sh)_LG</i> | <i>Fl(co)_LG</i> | <i>Fl(sh)_MK</i> | <i>Fl(co)_MK</i> |
|-------------------|-------------------|-------------------|-------------------|-------------------|------------------|------------------|------------------|------------------|
| <i>Fl(sh)_SRa</i> |                   | 0.999901          | <b>0.030882</b>   | 0.059906          | 1.000000         | 0.500284         | 0.103185         | <b>0.000275</b>  |
| <i>Fl(co)_SRa</i> |                   |                   | <b>0.043073</b>   | 0.091623          | 0.999887         | 0.683938         | 0.158556         | <b>0.000281</b>  |
| <i>Fl(sh)_SRb</i> |                   |                   |                   | 0.868982          | <b>0.030671</b>  | 0.218954         | 0.693211         | <b>0.006921</b>  |
| <i>Fl(co)_SRb</i> |                   |                   |                   |                   | 0.059381         | 0.598877         | 0.999512         | <b>0.000756</b>  |
| <i>Fl(sh)_LG</i>  |                   |                   |                   |                   |                  | 0.496658         | 0.102264         | <b>0.000275</b>  |
| <i>Fl(co)_LG</i>  |                   |                   |                   |                   |                  |                  | 0.828447         | <b>0.000364</b>  |
| <i>Fl(sh)_MK</i>  |                   |                   |                   |                   |                  |                  |                  | <b>0.000597</b>  |
| <i>Fl(co)_MK</i>  |                   |                   |                   |                   |                  |                  |                  |                  |

**Table S9.** Significance *p*-levels from the Tukey HSD test (honestly significant difference) for the antioxidant activity of “Florina” apple extracts (RSA – radical scavenging activity, %, at 15 min; organic shell apple extracts: *Fl(sh)\_SRa* and *Fl(sh)\_SRb*; organic core apple extracts: *Fl(co)\_SRa* and *Fl(co)\_SRb*; non-organic shell apple extracts: *Fl(sh)\_LG* and *Fl(sh)\_MK*; non-organic core apple extracts: *Fl(co)\_LG* and *Fl(co)\_MK*). *p*-level values lower than 0.05 are bolded.

|                   | <i>Fl(sh)_SRa</i> | <i>Fl(co)_SRa</i> | <i>Fl(sh)_SRb</i> | <i>Fl(co)_SRb</i> | <i>Fl(sh)_LG</i> | <i>Fl(co)_LG</i> | <i>Fl(sh)_MK</i> | <i>Fl(co)_MK</i> |
|-------------------|-------------------|-------------------|-------------------|-------------------|------------------|------------------|------------------|------------------|
| <i>Fl(sh)_SRa</i> |                   | 1.000000          | 0.059998          | 0.199107          | 1.000000         | 0.999781         | 0.424263         | <b>0.000372</b>  |
| <i>Fl(co)_SRa</i> |                   |                   | 0.062027          | 0.207429          | 1.000000         | 0.999878         | 0.439695         | <b>0.000375</b>  |
| <i>Fl(sh)_SRb</i> |                   |                   |                   | 0.758658          | 0.059828         | 0.088732         | 0.479451         | <b>0.022706</b>  |
| <i>Fl(co)_SRb</i> |                   |                   |                   |                   | 0.198413         | 0.317788         | 0.994823         | <b>0.001532</b>  |
| <i>Fl(sh)_LG</i>  |                   |                   |                   |                   |                  | 0.999770         | 0.422965         | <b>0.000372</b>  |
| <i>Fl(co)_LG</i>  |                   |                   |                   |                   |                  |                  | 0.622299         | <b>0.000417</b>  |
| <i>Fl(sh)_MK</i>  |                   |                   |                   |                   |                  |                  |                  | <b>0.000977</b>  |
| <i>Fl(co)_MK</i>  |                   |                   |                   |                   |                  |                  |                  |                  |

**Table S10.** Significance *p*-levels from the Tukey HSD test (honestly significant difference) for the antioxidant activity of “Generos” apple extracts (RSA – radical scavenging activity, %, at 1 min; organic shell apple extract: *Gn(sh)\_SR*; organic core apple extract: *Gn(co)\_SR*; non-organic shell apple extract: *Gn(sh)\_LG*; non-organic core apple extract: *Gn(co)\_LG*). *p*-level values lower than 0.05 are bolded.

|                  | <i>Gn(sh)_SR</i> | <i>Gn(co)_SR</i> | <i>Gn(sh)_LG</i> | <i>Gn(co)_LG</i> |
|------------------|------------------|------------------|------------------|------------------|
| <i>Gn(sh)_SR</i> |                  | 0.064085         | 0.997978         | <b>0.001100</b>  |
| <i>Gn(co)_SR</i> |                  |                  | 0.055782         | <b>0.003931</b>  |
| <i>Gn(sh)_LG</i> |                  |                  |                  | <b>0.001055</b>  |
| <i>Gn(co)_LG</i> |                  |                  |                  |                  |

**Table S11.** Significance *p*-levels from the Tukey HSD test (honestly significant difference) for the antioxidant activity of “Generos” apple extracts (RSA – radical scavenging activity, %, at 3 min; organic shell apple extract: *Gn(sh)\_SR*; organic core apple extract: *Gn(co)\_SR*; non-organic shell apple extract: *Gn(sh)\_LG*; non-organic core apple extract: *Gn(co)\_LG*). *p*-level values lower than 0.05 are bolded.

|                  | <i>Gn(sh)_SR</i> | <i>Gn(co)_SR</i> | <i>Gn(sh)_LG</i> | <i>Gn(co)_LG</i> |
|------------------|------------------|------------------|------------------|------------------|
| <i>Gn(sh)_SR</i> |                  | 0.998480         | <b>0.017927</b>  | <b>0.001438</b>  |
| <i>Gn(co)_SR</i> |                  |                  | <b>0.016259</b>  | <b>0.001505</b>  |
| <i>Gn(sh)_LG</i> |                  |                  |                  | <b>0.000472</b>  |
| <i>Gn(co)_LG</i> |                  |                  |                  |                  |

**Table S12.** Significance *p*-levels from the Tukey HSD test (honestly significant difference) for the antioxidant activity of “Generos” apple extracts (RSA – radical scavenging activity, %, at 5 min; organic shell apple extract: *Gn(sh)\_SR*; organic core apple extract: *Gn(co)\_SR*; non-organic shell apple extract: *Gn(sh)\_LG*; non-organic core apple extract: *Gn(co)\_LG*). *p*-level values lower than 0.05 are bolded.

|                  | <i>Gn(sh)_SR</i> | <i>Gn(co)_SR</i> | <i>Gn(sh)_LG</i> | <i>Gn(co)_LG</i> |
|------------------|------------------|------------------|------------------|------------------|
| <i>Gn(sh)_SR</i> |                  | <b>0.047922</b>  | <b>0.002524</b>  | <b>0.002490</b>  |
| <i>Gn(co)_SR</i> |                  |                  | <b>0.019332</b>  | <b>0.000786</b>  |
| <i>Gn(sh)_LG</i> |                  |                  |                  | <b>0.000386</b>  |
| <i>Gn(co)_LG</i> |                  |                  |                  |                  |



**Table S13.** Significance *p*-levels from the Tukey HSD test (honestly significant difference) for the antioxidant activity of “Generos” apple extracts (RSA – radical scavenging activity, %, at 15 min; organic shell apple extract: *Gn(sh)\_SR*; organic core apple extract: *Gn(co)\_SR*; non-organic shell apple extract: *Gn(sh)\_LG*; non-organic core apple extract: *Gn(co)\_LG*). *p*-level values lower than 0.05 are bolded.

|                  | <i>Gn(sh)_SR</i> | <i>Gn(co)_SR</i> | <i>Gn(sh)_LG</i> | <i>Gn(co)_LG</i> |
|------------------|------------------|------------------|------------------|------------------|
| <i>Gn(sh)_SR</i> |                  | <b>0.000387</b>  | <b>0.000374</b>  | <b>0.036497</b>  |
| <i>Gn(co)_SR</i> |                  |                  | 0.922697         | <b>0.000654</b>  |
| <i>Gn(sh)_LG</i> |                  |                  |                  | <b>0.000593</b>  |
| <i>Gn(co)_LG</i> |                  |                  |                  |                  |

**Table S14.** Significance *p*-levels from the Tukey HSD test (honestly significant difference) for the antioxidant activity of “Starkrimson” apple extracts (RSA – radical scavenging activity, %, at 1 min; organic shell apple extracts: *Sk(sh)\_SRa* and *Sk(sh)\_SRb*; organic core apple extract: *Sk(co)\_SRa*; non-organic shell apple extract: *Sk(sh)\_MK*; non-organic core apple extract: *Sk(co)\_MK*). *p*-level values lower than 0.05 are bolded.

|                   | <i>Sk(sh)_SRa</i> | <i>Sk(co)_SRa</i> | <i>Sk(sh)_SRb</i> | <i>Sk(sh)_MK</i> | <i>Sk(co)_MK</i> |
|-------------------|-------------------|-------------------|-------------------|------------------|------------------|
| <i>Sk(sh)_SRa</i> |                   | <b>0.001069</b>   | 0.890317          | <b>0.000272</b>  | <b>0.000271</b>  |
| <i>Sk(co)_SRa</i> |                   |                   | <b>0.000784</b>   | <b>0.000475</b>  | <b>0.000271</b>  |
| <i>Sk(sh)_SRb</i> |                   |                   |                   | <b>0.000271</b>  | <b>0.000271</b>  |
| <i>Sk(sh)_MK</i>  |                   |                   |                   |                  | <b>0.000548</b>  |
| <i>Sk(co)_MK</i>  |                   |                   |                   |                  |                  |

**Table S15.** Significance *p*-levels from the Tukey HSD test (honestly significant difference) for the antioxidant activity of “Starkrimson” apple extracts (RSA – radical scavenging activity, %, at 3 min; organic shell apple extracts: *Sk(sh)\_SRa* and *Sk(sh)\_SRb*; organic core apple extract: *Sk(co)\_SRa*; non-organic shell apple extract: *Sk(sh)\_MK*; non-organic core apple extract: *Sk(co)\_MK*). *p*-level values lower than 0.05 are bolded.

|                   | <i>Sk(sh)_SRa</i> | <i>Sk(co)_SRa</i> | <i>Sk(sh)_SRb</i> | <i>Sk(sh)_MK</i> | <i>Sk(co)_MK</i> |
|-------------------|-------------------|-------------------|-------------------|------------------|------------------|
| <i>Sk(sh)_SRa</i> |                   | 0.056558          | 0.902596          | <b>0.000300</b>  | <b>0.000271</b>  |
| <i>Sk(co)_SRa</i> |                   |                   | 0.131536          | <b>0.000499</b>  | <b>0.000271</b>  |
| <i>Sk(sh)_SRb</i> |                   |                   |                   | <b>0.000316</b>  | <b>0.000271</b>  |
| <i>Sk(sh)_MK</i>  |                   |                   |                   |                  | <b>0.000272</b>  |
| <i>Sk(co)_MK</i>  |                   |                   |                   |                  |                  |

**Table S16.** Significance *p*-levels from the Tukey HSD test (honestly significant difference) for the antioxidant activity of “Starkrimson” apple extracts (RSA – radical scavenging activity, %, at 5 min; organic shell apple extracts: *Sk(sh)\_SRa* and *Sk(sh)\_SRb*; organic core apple extract: *Sk(co)\_SRa*; non-organic shell apple extract: *Sk(sh)\_MK*; non-organic core apple extract: *Sk(co)\_MK*). *p*-level values lower than 0.05 are bolded.

|                   | <i>Sk(sh)_SRa</i> | <i>Sk(co)_SRa</i> | <i>Sk(sh)_SRb</i> | <i>Sk(sh)_MK</i> | <i>Sk(co)_MK</i> |
|-------------------|-------------------|-------------------|-------------------|------------------|------------------|
| <i>Sk(sh)_SRa</i> |                   | 0.982634          | 0.856420          | <b>0.001030</b>  | <b>0.000271</b>  |
| <i>Sk(co)_SRa</i> |                   |                   | 0.987631          | <b>0.001261</b>  | <b>0.000271</b>  |
| <i>Sk(sh)_SRb</i> |                   |                   |                   | <b>0.001553</b>  | <b>0.000271</b>  |
| <i>Sk(sh)_MK</i>  |                   |                   |                   |                  | <b>0.000271</b>  |
| <i>Sk(co)_MK</i>  |                   |                   |                   |                  |                  |

**Table S17.** Significance *p*-levels from the Tukey HSD test (honestly significant difference) for the antioxidant activity of “Starkrimson” apple extracts (RSA – radical scavenging activity, %, at 15 min; organic shell apple extracts: *Sk(sh)\_SRa* and *Sk(sh)\_SRb*; organic core apple extract: *Sk(co)\_SRa*; non-organic shell apple extract: *Sk(sh)\_MK*; non-organic core apple extract: *Sk(co)\_LG*). *p*-level values lower than 0.05 are bolded.

|                   | <i>Sk(sh)_SRa</i> | <i>Sk(co)_SRa</i> | <i>Sk(sh)_SRb</i> | <i>Sk(sh)_MK</i> | <i>Sk(co)_MK</i> |
|-------------------|-------------------|-------------------|-------------------|------------------|------------------|
| <i>Sk(sh)_SRa</i> |                   | 0.862829          | 0.901720          | 0.321557         | <b>0.000271</b>  |
| <i>Sk(co)_SRa</i> |                   |                   | 0.455069          | 0.119220         | <b>0.000271</b>  |
| <i>Sk(sh)_SRb</i> |                   |                   |                   | 0.698331         | <b>0.000271</b>  |
| <i>Sk(sh)_MK</i>  |                   |                   |                   |                  | <b>0.000272</b>  |
| <i>Sk(co)_MK</i>  |                   |                   |                   |                  |                  |

## 2. DPPH· kinetics approach for the apple extracts

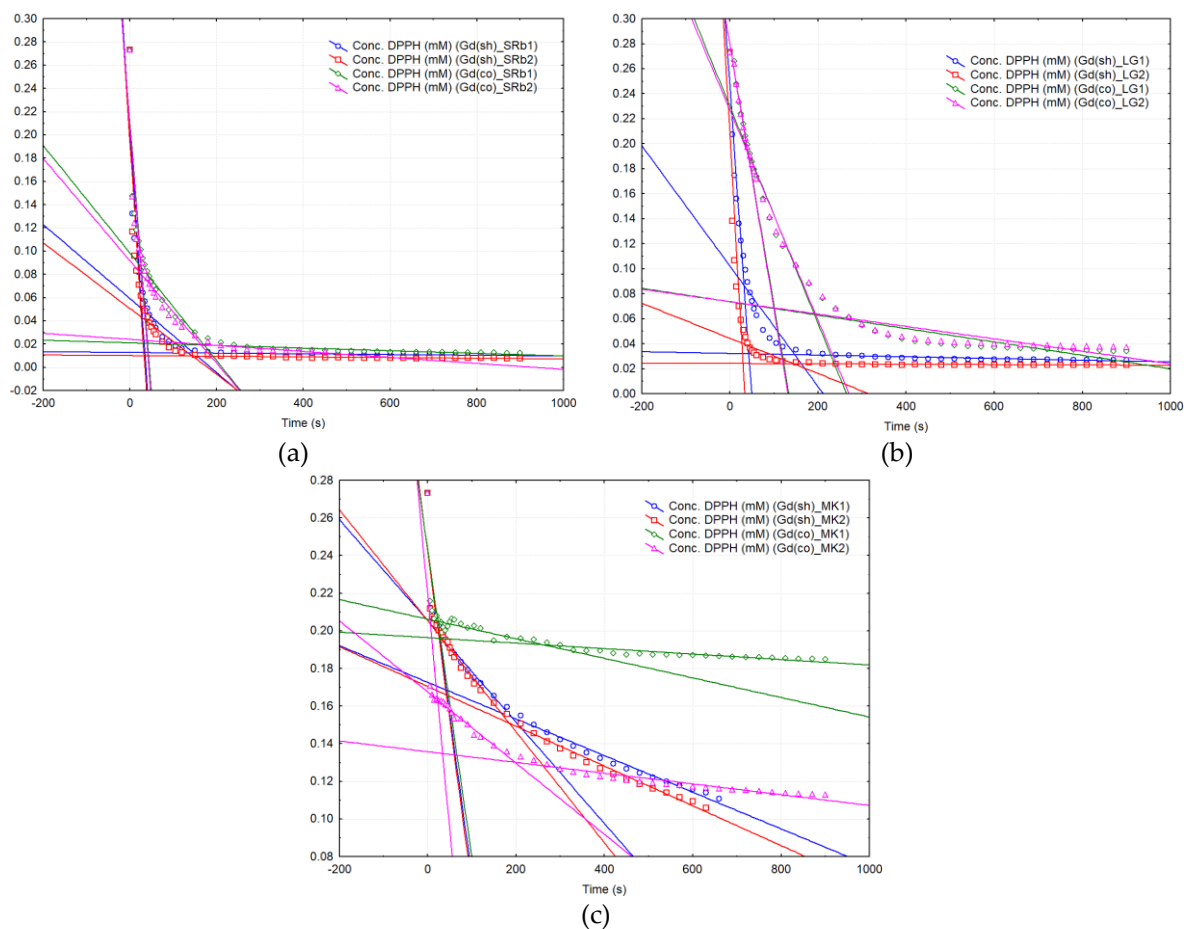

**Figure S5.** Variation of the DPPH· concentration during the reaction with antioxidant compounds from the extracts obtained from: (a) organic shell and core “Golden Delicious” apple variety (*Gd(sh)\_SRa* and *Gd(co)\_SRa*); (b) non-organic shell and core “Golden Delicious” apple variety (*Gd(sh)\_LG* and *LG(co)\_AR*); (c) non-organic shell and core “Golden Delicious” apple variety (*Gd(sh)\_MK* and *Gd(co)\_MK*) (all determinations are presented as duplicates “1” and “2”).

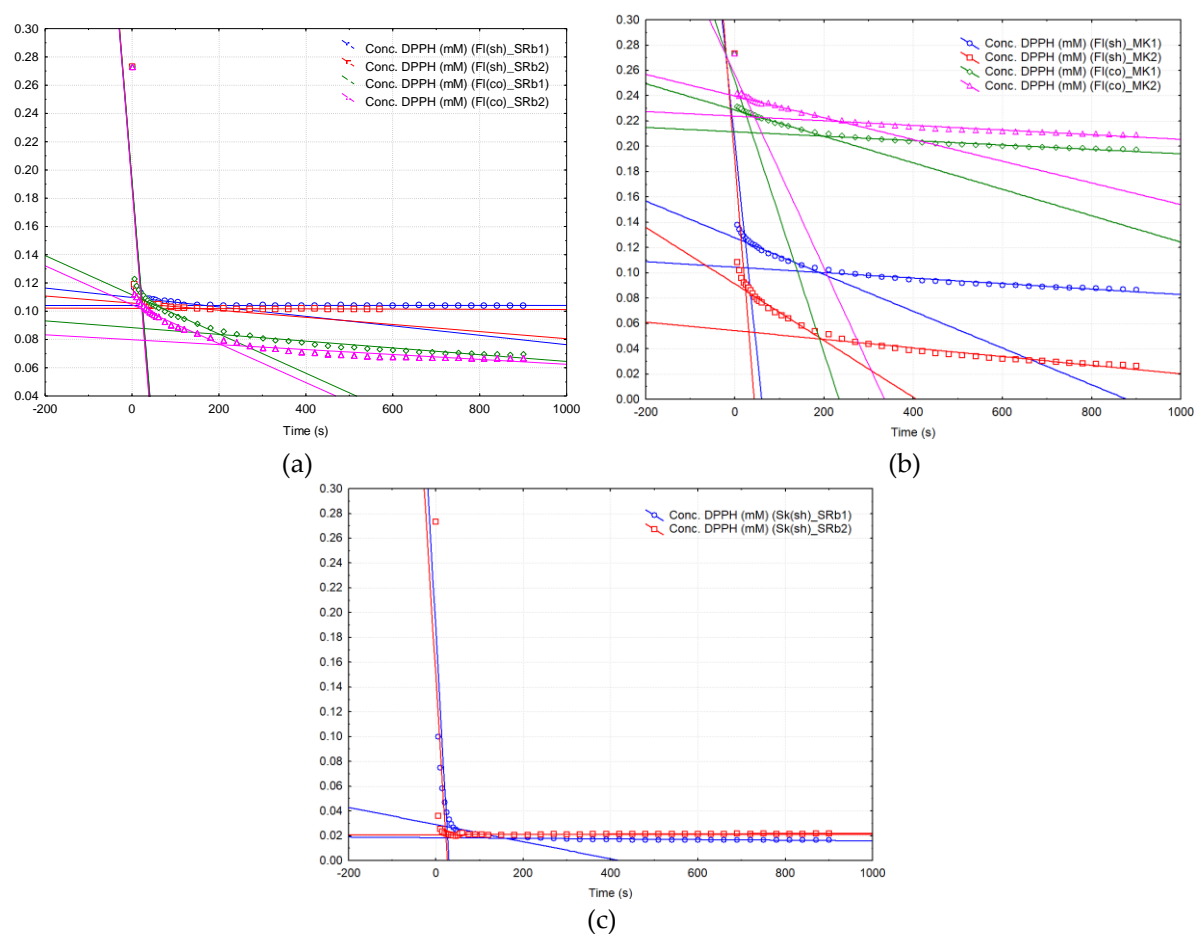

**Figure S6.** Variation of the DPPH· concentration during the reaction with antioxidant compounds from the extracts obtained from: (a) organic shell and core “Florina” apple variety (*Fl(sh)\_SRb* and *Fl(co)\_SRb*); (b) non-organic shell and core “Florina” apple variety (*Fl(sh)\_MK* and *Fl(co)\_MK*); (c) organic shell “Starkrimson” apple variety (*Sk(sh)\_SRb*) (all determinations are presented as duplicates “1” and “2”).

**Table S18.** Values of the mean DPPH· reaction rates ( $\bar{v}_1$ ,  $\bar{v}_2$  and  $\bar{v}_3$ ) for the standard antioxidant compound solutions (*Rv\_1mM/0.2mM/0.1mM* – resveratrol solutions at concentrations of 1 mM/0.2 mM/0.1 mM; *PG\_0.2mM* – propyl gallate solution at a concentration of 0.2 mM). Values are expressed as mean ( $\pm$  standard deviation, SD).

| Code             | Antioxidant type | DPPH· reaction rate                                     | DPPH· reaction rate                                     | DPPH· reaction rate                                     |
|------------------|------------------|---------------------------------------------------------|---------------------------------------------------------|---------------------------------------------------------|
|                  |                  | on $t_1$ time range,<br>$\bar{v}_1$ ( $\mu\text{M/s}$ ) | on $t_2$ time range,<br>$\bar{v}_2$ ( $\mu\text{M/s}$ ) | on $t_3$ time range,<br>$\bar{v}_3$ ( $\mu\text{M/s}$ ) |
| <i>Rv_1mM</i>    | <i>Natural</i>   | 3.40 ( $\pm 0.00$ )                                     | 0.30 ( $\pm 0.00$ )                                     | 0.057 ( $\pm 0.001$ )                                   |
| <i>Rv_0.2mM</i>  | <i>Natural</i>   | 2.85 ( $\pm 0.07$ )                                     | 0.10 ( $\pm 0.00$ )                                     | 0.024 ( $\pm 0.001$ )                                   |
| <i>Rv_0.1mM*</i> | <i>Natural</i>   | 2.60                                                    | 0.06                                                    | 0.014                                                   |
| <i>PG_0.2mM*</i> | <i>Synthetic</i> | 4.20                                                    | 0.20                                                    | 0.030                                                   |

\*Single determination.

**Table S19.** Significance  $p$ -levels from the Tukey HSD test (honestly significant difference) for the DPPH· reaction rate on the  $\Delta t_1 = 0\text{--}30$  s in the presence of “Golden Delicious” apple extracts ( $\bar{v}_1$ ,  $\mu\text{M/s}$ ; organic shell apple extracts:  $Gd(sh)_{SRa}$  and  $Gd(sh)_{SRb}$ ; organic core apple extracts:  $Gd(co)_{SRa}$  and  $Gd(co)_{SRb}$ ; non-organic shell apple extracts:  $Gd(sh)_{AR}$ ,  $Gd(sh)_{LG}$  and  $Gd(sh)_{MK}$ ; non-organic core apple extracts:  $Gd(co)_{AR}$ ,  $Gd(co)_{LG}$  and  $Gd(co)_{MK}$ ).  $p$ -level values lower than 0.05 are bolded.

[illegible]

**Table S20.** Significance  $p$ -levels from the Tukey HSD test (honestly significant difference) for the DPPH· reaction rate on the  $\Delta t_2 = 30\text{--}180$  s in the presence of “Golden Delicious” apple extracts ( $\bar{v}_2$ ,  $\mu\text{M/s}$ ; organic shell apple extracts:  $Gd(sh)_{SRA}$  and  $Gd(sh)_{SRB}$ ; organic core apple extracts:  $Gd(co)_{SRA}$  and  $Gd(co)_{SRB}$ ; non-organic shell apple extracts:  $Gd(sh)_{AR}$ ,  $Gd(sh)_{LG}$  and  $Gd(sh)_{MK}$ ; non-organic core apple extracts:  $Gd(co)_{AR}$ ,  $Gd(co)_{LG}$  and  $Gd(co)_{MK}$ ).  $p$ -level values lower than 0.05 are bolded.

[illegible]

**Table S21.** Significance  $p$ -levels from the Tukey HSD test (honestly significant difference) for the DPPH· reaction rate on the  $\Delta t_3 = 180\text{--}900$  s in the presence of “Golden Delicious” apple extracts ( $\bar{v}_3$ ,  $\mu\text{M/s}$ ; organic shell apple extracts:  $Gd(sh)_{SRa}$  and  $Gd(sh)_{SRb}$ ; organic core apple extracts:  $Gd(co)_{SRa}$  and  $Gd(co)_{SRb}$ ; non-organic shell apple extracts:  $Gd(sh)_{AR}$ ,  $Gd(sh)_{LG}$  and  $Gd(sh)_{MK}$ ; non-organic core apple extracts:  $Gd(co)_{AR}$ ,  $Gd(co)_{LG}$  and  $Gd(co)_{MK}$ ).  $p$ -level values lower than 0.05 are bolded.

|                | $Gd(sh)_{SRa}$ | $Gd(co)_{SRa}$  | $Gd(sh)_{SRb}$  | $Gd(co)_{SRb}$ | $Gd(sh)_{AR}$   | $Gd(co)_{AR}$ | $Gd(sh)_{LG}$   | $Gd(co)_{LG}$   | $Gd(sh)_{MK}$   | $Gd(co)_{MK}$   |
|----------------|----------------|-----------------|-----------------|----------------|-----------------|---------------|-----------------|-----------------|-----------------|-----------------|
| $Gd(sh)_{SRa}$ |                | <b>0.017361</b> | 0.984368        | 0.879938       | 0.999653        | 0.946999      | 0.995897        | <b>0.001429</b> | <b>0.000225</b> | 0.655124        |
| $Gd(co)_{SRa}$ |                |                 | <b>0.004507</b> | 0.138460       | <b>0.040365</b> | 0.101565      | <b>0.005686</b> | 0.623085        | <b>0.000268</b> | 0.259677        |
| $Gd(sh)_{SRb}$ |                |                 |                 | 0.377600       | 0.819871        | 0.482708      | 1.000000        | <b>0.000565</b> | <b>0.000225</b> | 0.209722        |
| $Gd(co)_{SRb}$ |                |                 |                 |                | 0.994389        | 1.000000      | 0.463340        | <b>0.008468</b> | <b>0.000225</b> | 0.999953        |
| $Gd(sh)_{AR}$  |                |                 |                 |                |                 | 0.999357      | 0.893729        | <b>0.002814</b> | <b>0.000225</b> | 0.923374        |
| $Gd(co)_{AR}$  |                |                 |                 |                |                 |               | 0.578600        | <b>0.006327</b> | <b>0.000225</b> | 0.998962        |
| $Gd(sh)_{LG}$  |                |                 |                 |                |                 |               |                 | <b>0.000654</b> | <b>0.000225</b> | 0.266166        |
| $Gd(co)_{LG}$  |                |                 |                 |                |                 |               |                 |                 | <b>0.000690</b> | <b>0.015990</b> |
| $Gd(sh)_{MK}$  |                |                 |                 |                |                 |               |                 |                 |                 | <b>0.000226</b> |
| $Gd(co)_{MK}$  |                |                 |                 |                |                 |               |                 |                 |                 |                 |

**Table S22.** Significance  $p$ -levels from the Tukey HSD test (honestly significant difference) for the DPPH· reaction rate on the  $\Delta t_1 = 0\text{--}30$  s in the presence of “Florina” apple extracts ( $\bar{v}_1$ ,  $\mu\text{M/s}$ ; organic shell apple extracts:  $Fl(sh)_{SRa}$  and  $Fl(sh)_{SRb}$ ; organic core apple extracts:  $Fl(co)_{SRa}$  and  $Fl(co)_{SRb}$ ; non-organic shell apple extracts:  $Fl(sh)_{LG}$  and  $Fl(sh)_{MK}$ ; non-organic core apple extracts:  $Fl(co)_{LG}$  and  $Fl(co)_{MK}$ ).  $p$ -level values lower than 0.05 are bolded.

|                | $Fl(sh)_{SRa}$ | $Fl(co)_{SRa}$  | $Fl(sh)_{SRb}$  | $Fl(co)_{SRb}$  | $Fl(sh)_{LG}$   | $Fl(co)_{LG}$   | $Fl(sh)_{MK}$   | $Fl(co)_{MK}$   |
|----------------|----------------|-----------------|-----------------|-----------------|-----------------|-----------------|-----------------|-----------------|
| $Fl(sh)_{SRa}$ |                | <b>0.008713</b> | <b>0.022322</b> | <b>0.006380</b> | 0.716882        | <b>0.000608</b> | <b>0.008713</b> | <b>0.000240</b> |
| $Fl(co)_{SRa}$ |                |                 | 1.000000        | 0.999950        | <b>0.002081</b> | 0.088110        | 1.000000        | <b>0.000566</b> |
| $Fl(sh)_{SRb}$ |                |                 |                 | 1.000000        | <b>0.005858</b> | 0.224680        | 1.000000        | <b>0.001717</b> |
| $Fl(co)_{SRb}$ |                |                 |                 |                 | <b>0.001625</b> | 0.129777        | 0.999950        | <b>0.000657</b> |
| $Fl(sh)_{LG}$  |                |                 |                 |                 |                 | <b>0.000349</b> | <b>0.002081</b> | <b>0.000238</b> |
| $Fl(co)_{LG}$  |                |                 |                 |                 |                 |                 | 0.088110        | <b>0.007442</b> |
| $Fl(sh)_{MK}$  |                |                 |                 |                 |                 |                 |                 | <b>0.000566</b> |
| $Fl(co)_{MK}$  |                |                 |                 |                 |                 |                 |                 |                 |

**Table S23.** Significance  $p$ -levels from the Tukey HSD test (honestly significant difference) for the DPPH· reaction rate on the  $\Delta t_3 = 30\text{--}180$  s in the presence of “Florina” apple extracts ( $\bar{v}_2$ ,  $\mu\text{M/s}$ ; organic shell apple extracts:  $Fl(sh)_{SRa}$  and  $Fl(sh)_{SRb}$ ; organic core apple extracts:  $Fl(co)_{SRa}$  and  $Fl(co)_{SRb}$ ; non-organic shell apple extracts:  $Fl(sh)_{LG}$  and  $Fl(sh)_{MK}$ ; non-organic core apple extracts:  $Fl(co)_{LG}$  and  $Fl(co)_{MK}$ ).  $p$ -level values lower than 0.05 are bolded.

|                | $Fl(sh)_{SRa}$ | $Fl(co)_{SRa}$  | $Fl(sh)_{SRb}$  | $Fl(co)_{SRb}$  | $Fl(sh)_{LG}$   | $Fl(co)_{LG}$   | $Fl(sh)_{MK}$   | $Fl(co)_{MK}$   |
|----------------|----------------|-----------------|-----------------|-----------------|-----------------|-----------------|-----------------|-----------------|
| $Fl(sh)_{SRa}$ |                | <b>0.013312</b> | 0.111716        | 0.172921        | 0.776893        | <b>0.006349</b> | 0.405884        | 0.152349        |
| $Fl(co)_{SRa}$ |                |                 | <b>0.001582</b> | <b>0.001052</b> | <b>0.003231</b> | 0.990386        | <b>0.001773</b> | <b>0.000984</b> |
| $Fl(sh)_{SRb}$ |                |                 |                 | 0.971984        | 0.454293        | <b>0.001042</b> | 0.762975        | 0.983318        |
| $Fl(co)_{SRb}$ |                |                 |                 |                 | 0.776893        | <b>0.000682</b> | 0.990386        | 1.000000        |
| $Fl(sh)_{LG}$  |                |                 |                 |                 |                 | <b>0.001773</b> | 0.990386        | 0.723953        |
| $Fl(co)_{LG}$  |                |                 |                 |                 |                 |                 | <b>0.001052</b> | <b>0.000647</b> |
| $Fl(sh)_{MK}$  |                |                 |                 |                 |                 |                 |                 | 0.980223        |
| $Fl(co)_{MK}$  |                |                 |                 |                 |                 |                 |                 |                 |

**Table S24.** Significance  $p$ -levels from the Tukey HSD test (honestly significant difference) for the DPPH· reaction rate on the  $\Delta t_3 = 180\text{--}900$  s in the presence of “Florina” apple extracts ( $\bar{v}_3$ ,  $\mu\text{M/s}$ ; organic shell apple extracts:  $Fl(sh)_{SRa}$  and  $Fl(sh)_{SRb}$ ; organic core apple extracts:  $Fl(co)_{SRa}$  and  $Fl(co)_{SRb}$ ; non-organic shell apple extracts:  $Fl(sh)_{LG}$  and  $Fl(sh)_{MK}$ ; non-organic core apple extracts:  $Fl(co)_{LG}$  and  $Fl(co)_{MK}$ ).  $p$ -level values lower than 0.05 are bolded.

|                | $Fl(sh)_{SRa}$ | $Fl(co)_{SRa}$ | $Fl(sh)_{SRb}$ | $Fl(co)_{SRb}$ | $Fl(sh)_{LG}$ | $Fl(co)_{LG}$ | $Fl(sh)_{MK}$ | $Fl(co)_{MK}$ |
|----------------|----------------|----------------|----------------|----------------|---------------|---------------|---------------|---------------|
| $Fl(sh)_{SRa}$ |                | 0.999826       | 1.000000       | 0.998759       | 1.000000      | 0.062393      | 0.991061      | 0.999570      |
| $Fl(co)_{SRa}$ |                |                | 0.999915       | 1.000000       | 0.999791      | 0.099255      | 0.999919      | 1.000000      |
| $Fl(sh)_{SRb}$ |                |                |                | 0.999463       | 1.000000      | 0.139493      | 0.996299      | 0.999803      |
| $Fl(co)_{SRb}$ |                |                |                |                | 0.998593      | 0.117372      | 0.999998      | 1.000000      |
| $Fl(sh)_{LG}$  |                |                |                |                |               | 0.061604      | 0.990302      | 0.999498      |
| $Fl(co)_{LG}$  |                |                |                |                |               |               | 0.150630      | 0.106424      |
| $Fl(sh)_{MK}$  |                |                |                |                |               |               |               | 0.999976      |
| $Fl(co)_{MK}$  |                |                |                |                |               |               |               |               |

**Table S25.** Significance  $p$ -levels from the Tukey HSD test (honestly significant difference) for the DPPH· reaction rate on the  $\Delta t_1 = 0\text{--}30$  s in the presence of “Generos” apple extracts ( $\bar{v}_1$ ,  $\mu\text{M/s}$ ; organic shell apple extract:  $Gn(sh)_{SR}$ ; organic core apple extract:  $Gn(co)_{SR}$ ; non-organic shell apple extract:  $Gn(sh)_{LG}$ ; non-organic core apple extract:  $Gn(co)_{LG}$ ).  $p$ -level values lower than 0.05 are bolded.

|               | $Gn(sh)_{SR}$ | $Gn(co)_{SR}$   | $Gn(sh)_{LG}$   | $Gn(co)_{LG}$   |
|---------------|---------------|-----------------|-----------------|-----------------|
| $Gn(sh)_{SR}$ |               | <b>0.014238</b> | 0.401220        | <b>0.000763</b> |
| $Gn(co)_{SR}$ |               |                 | <b>0.047895</b> | <b>0.004838</b> |
| $Gn(sh)_{LG}$ |               |                 |                 | <b>0.001129</b> |
| $Gn(co)_{LG}$ |               |                 |                 |                 |

**Table S26.** Significance  $p$ -levels from the Tukey HSD test (honestly significant difference) for the DPPH· reaction rate on the  $\Delta t_2 = 30$ –180 s in the presence of “Generos” apple extracts ( $\bar{v}_2$ ,  $\mu\text{M/s}$ ; organic shell apple extract:  $Gn(sh)_{SR}$ ; organic core apple extract:  $Gn(co)_{SR}$ ; non-organic shell apple extract:  $Gn(sh)_{LG}$ ; non-organic core apple extract:  $Gn(co)_{LG}$ ).  $p$ -level values lower than 0.05 are bolded.

|               | $Gn(sh)_{SR}$ | $Gn(co)_{SR}$   | $Gn(sh)_{LG}$   | $Gn(co)_{LG}$   |
|---------------|---------------|-----------------|-----------------|-----------------|
| $Gn(sh)_{SR}$ |               | <b>0.007443</b> | <b>0.007443</b> | <b>0.007443</b> |
| $Gn(co)_{SR}$ |               |                 | 1.000000        | 1.000000        |
| $Gn(sh)_{LG}$ |               |                 |                 | 1.000000        |
| $Gn(co)_{LG}$ |               |                 |                 |                 |

**Table S27.** Significance  $p$ -levels from the Tukey HSD test (honestly significant difference) for the DPPH· reaction rate on the  $\Delta t_3 = 180$ –900 s in the presence of “Generos” apple extracts ( $\bar{v}_3$ ,  $\mu\text{M/s}$ ; organic shell apple extract:  $Gn(sh)_{SR}$ ; organic core apple extract:  $Gn(co)_{SR}$ ; non-organic shell apple extract:  $Gn(sh)_{LG}$ ; non-organic core apple extract:  $Gn(co)_{LG}$ ).  $p$ -level values lower than 0.05 are bolded.

|               | $Gn(sh)_{SR}$ | $Gn(co)_{SR}$ | $Gn(sh)_{LG}$ | $Gn(co)_{LG}$ |
|---------------|---------------|---------------|---------------|---------------|
| $Gn(sh)_{SR}$ |               | 0.307240      | 0.974877      | 0.458049      |
| $Gn(co)_{SR}$ |               |               | 0.450686      | 0.971691      |
| $Gn(sh)_{LG}$ |               |               |               | 0.647153      |
| $Gn(co)_{LG}$ |               |               |               |               |

**Table S28.** Significance  $p$ -levels from the Tukey HSD test (honestly significant difference) for the DPPH· reaction rate on the  $\Delta t_1 = 0$ –30 s in the presence of “Starkrimson” apple extracts ( $\bar{v}_1$ ,  $\mu\text{M/s}$ ; organic shell apple extracts:  $Sk(sh)_{SRa}$  and  $Sk(sh)_{SRb}$ ; organic core apple extract:  $Sk(co)_{SRa}$ ; non-organic shell apple extract:  $Sk(sh)_{MK}$ ; non-organic core apple extract:  $Sk(co)_{MK}$ ).  $p$ -level values lower than 0.05 are bolded.

|                | $Sk(sh)_{SRa}$ | $Sk(co)_{SRa}$  | $Sk(sh)_{SRb}$  | $Sk(sh)_{MK}$   | $Sk(co)_{MK}$   |
|----------------|----------------|-----------------|-----------------|-----------------|-----------------|
| $Sk(sh)_{SRa}$ |                | <b>0.004159</b> | 1.000000        | <b>0.000356</b> | <b>0.000275</b> |
| $Sk(co)_{SRa}$ |                |                 | <b>0.004159</b> | <b>0.004159</b> | <b>0.000476</b> |
| $Sk(sh)_{SRb}$ |                |                 |                 | <b>0.000356</b> | <b>0.000275</b> |
| $Sk(sh)_{MK}$  |                |                 |                 |                 | <b>0.014434</b> |
| $Sk(co)_{MK}$  |                |                 |                 |                 |                 |

**Table S29.** Significance  $p$ -levels from the Tukey HSD test (honestly significant difference) for the DPPH· reaction rate on the  $\Delta t_2 = 30$ –180 s in the presence of “Starkrimson” apple extracts ( $\bar{v}_2$ ,  $\mu\text{M/s}$ ; organic shell apple extracts:  $Sk(sh)_{SRa}$  and  $Sk(sh)_{SRb}$ ; organic core apple extract:  $Sk(co)_{SRa}$ ; non-organic shell apple extract:  $Sk(sh)_{MK}$ ; non-organic core apple extract:  $Sk(co)_{MK}$ ).  $p$ -level values lower than 0.05 are bolded.

|                | $Sk(sh)_{SRa}$ | $Sk(co)_{SRa}$  | $Sk(sh)_{SRb}$  | $Sk(sh)_{MK}$   | $Sk(co)_{MK}$   |
|----------------|----------------|-----------------|-----------------|-----------------|-----------------|
| $Sk(sh)_{SRa}$ |                | <b>0.006906</b> | <b>0.038351</b> | <b>0.003110</b> | 1.000000        |
| $Sk(co)_{SRa}$ |                |                 | <b>0.000816</b> | 0.703256        | <b>0.006906</b> |
| $Sk(sh)_{SRb}$ |                |                 |                 | <b>0.000558</b> | <b>0.038351</b> |
| $Sk(sh)_{MK}$  |                |                 |                 |                 | <b>0.003110</b> |
| $Sk(co)_{MK}$  |                |                 |                 |                 |                 |



**Table S30.** Significance  $p$ -levels from the Tukey HSD test (honestly significant difference) for the DPPH· reaction rate on the  $\Delta t_3 = 180\text{--}900$  s in the presence of “Starkrimson” apple extracts ( $\bar{v}_3$ ,  $\mu\text{M/s}$ ; organic shell apple extracts:  $Sk(sh)_{SRa}$  and  $Sk(sh)_{SRb}$ ; organic core apple extract:  $Sk(co)_{SRa}$ ; non-organic shell apple extract:  $Sk(sh)_{MK}$ ; non-organic core apple extract:  $Sk(co)_{MK}$ ).  $p$ -level values lower than 0.05 are bolded.

|                | $Sk(sh)_{SRa}$ | $Sk(co)_{SRa}$  | $Sk(sh)_{SRb}$  | $Sk(sh)_{MK}$   | $Sk(co)_{MK}$   |
|----------------|----------------|-----------------|-----------------|-----------------|-----------------|
| $Sk(sh)_{SRa}$ |                | <b>0.012772</b> | 0.999924        | <b>0.000277</b> | <b>0.000735</b> |
| $Sk(co)_{SRa}$ |                |                 | <b>0.011632</b> | <b>0.000397</b> | <b>0.014135</b> |
| $Sk(sh)_{SRb}$ |                |                 |                 | <b>0.000276</b> | <b>0.000698</b> |
| $Sk(sh)_{MK}$  |                |                 |                 |                 | <b>0.002299</b> |
| $Sk(co)_{MK}$  |                |                 |                 |                 |                 |

### 3. Correlations and principal component analysis (PCA) of the antioxidant activity and DPPH $\cdot$ kinetics of apple extracts

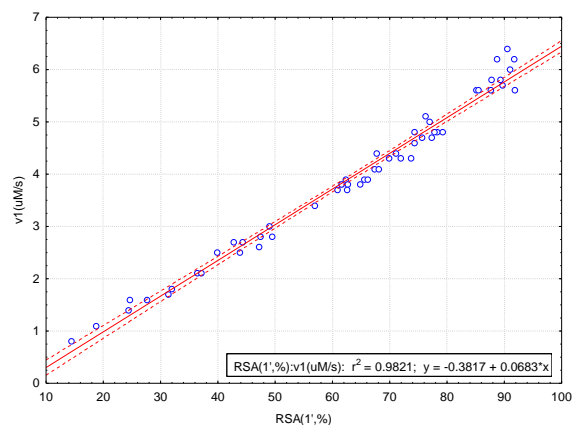

$$\bar{v}_1 = -0.38(\pm 0.08) + 0.068(\pm 0.001) \cdot \text{RSA}(1')$$

$$n = 54, r^2 = 0.982, F = 2855, s = 0.20, p < 0.00001$$

(a)

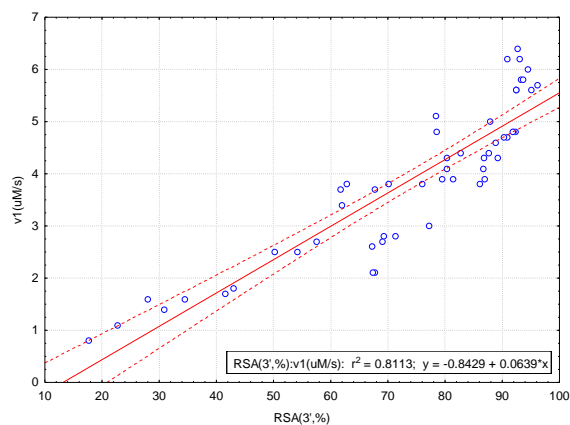

$$\bar{v}_1 = -0.84(\pm 0.33) + 0.064(\pm 0.004) \cdot \text{RSA}(3')$$

$$n = 54, r^2 = 0.901, F = 224, s = 0.64, p < 0.00001$$

(b)

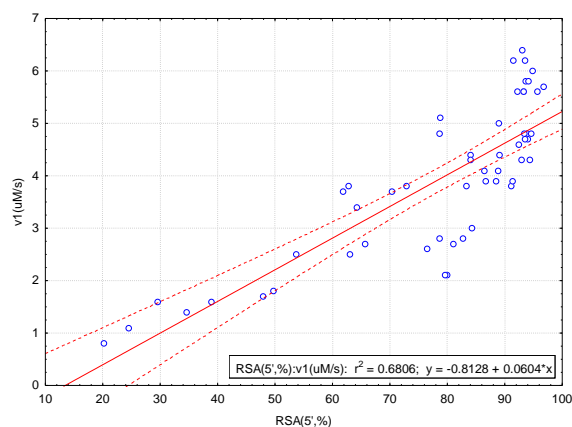

$$\bar{v}_1 = -0.81(\pm 0.46) + 0.060(\pm 0.006) \cdot \text{RSA}(5')$$

$$n = 54, r^2 = 0.825, F = 111, s = 0.84, p < 0.00001$$

(c)

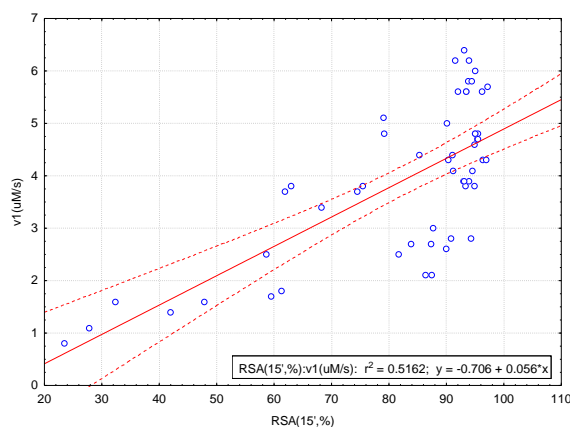

$$\bar{v}_1 = -0.71(\pm 0.64) + 0.056(\pm 0.008) \cdot \text{RSA}(15')$$

$$n = 54, r^2 = 0.718, F = 55, s = 1.03, p < 0.00001$$

(d)

**Figure S7.** Correlations between mean DPPH $\cdot$  reaction rate for the first time range of 0–30 s,  $\bar{v}_1$ , and antioxidant activity, RSA, at various times for all apple extracts. (a) RSA at 1 min; (b) RSA at 3 min; (c) RSA at 5 min; (d) RSA at 15 min.

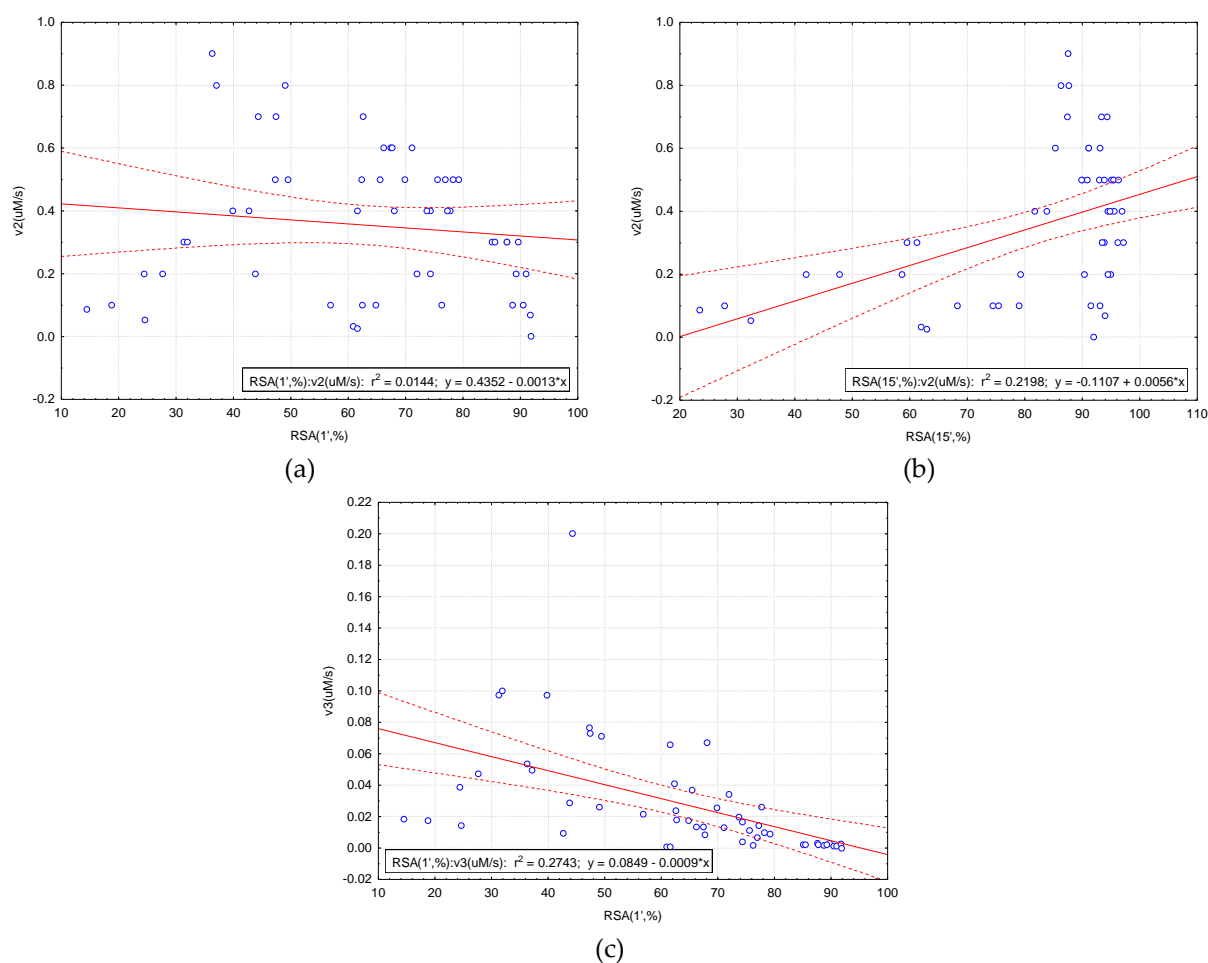

**Figure S8.** Representative dependences between the mean DPPH· reaction rates for the second and third time ranges of 30–180 s and 180–900 s ( $\bar{v}_2$  and  $\bar{v}_3$ ), and antioxidant activity, RSA, at various times for all apple extracts. These correlations are not statistically significant. (a)  $\bar{v}_2$  vs. RSA at 1 min; (b)  $\bar{v}_2$  vs. RSA at 15 min; (c)  $\bar{v}_3$  vs. RSA at 1 min.

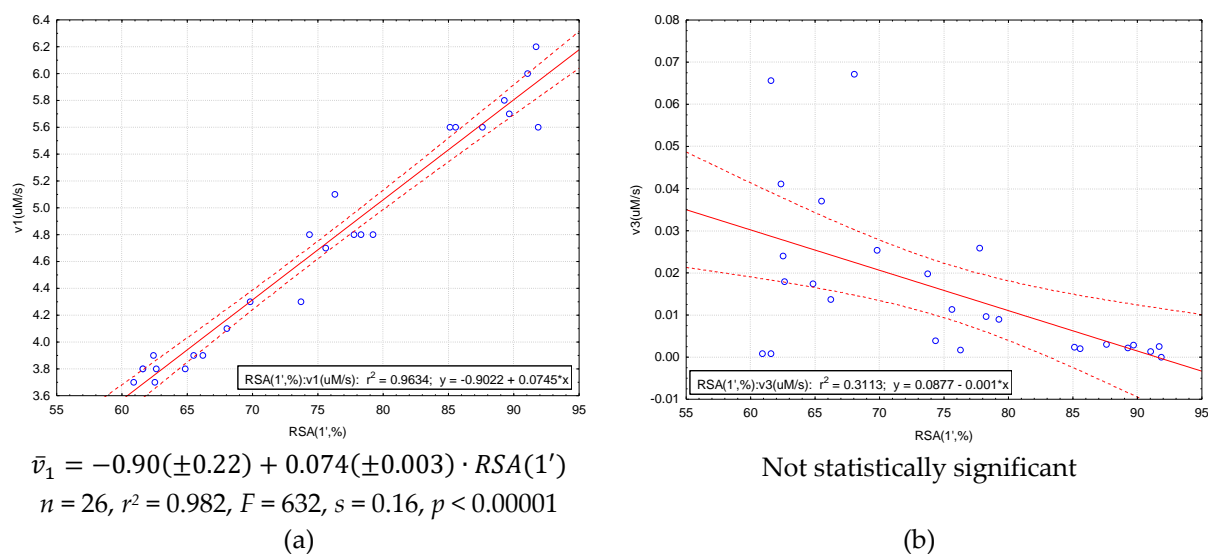

**Figure S9.** Representative correlations between mean DPPH· reaction rates for the first and third time ranges (0–30 s and 180–900 s,  $\bar{v}_1$  and  $\bar{v}_3$ ), and antioxidant activity, RSA, at various times for all organic apple extracts. (a)  $\bar{v}_1$  vs. RSA at 1 min; (a)  $\bar{v}_3$  vs. RSA at 1 min.

*Linear correlation between antioxidant and DPPH· kinetic parameters and classical analysis parameters for all apple core samples (Eqs. S1-S4)*

$$RSA(3') = -103.5(\pm 88.8) + 31.02(\pm 16.83) \cdot pH \quad (S1)$$

$$n = 26, r = 0.352, F = 3.4, s = 25.6, p < 0.08$$

$$RSA(5') = -112.5(\pm 88.9) + 33.62(\pm 16.85) \cdot pH \quad (S2)$$

$$n = 26, r = 0.377, F = 4.0, s = 25.6, p < 0.06$$

$$RSA(15') = -112.3(\pm 83.4) + 34.84(\pm 15.81) \cdot pH \quad (S3)$$

$$n = 26, r = 0.410, F = 4.9, s = 24.05, p < 0.04$$

$$\bar{v}_1 = -1.65(\pm 0.68) + 0.38(\pm 0.13) \cdot pH \quad (S4)$$

$$n = 26, r = 0.516, F = 8.7, s = 0.20, p < 0.007$$

*Linear correlation between antioxidant and DPPH· kinetic parameters and classical analysis parameters for organic apple core samples (Eqs. S5-S9)*

$$RSA(1') = 21.78(\pm 7.77) + 3.40(\pm 0.60) \cdot Sugar\_content \quad (S5)$$

$$n = 12, r = 0.880, F = 34.5, s = 2.93, p < 0.0002$$

$$RSA(3') = 16.97 + 4.81(\pm 1.42) \cdot Sugar\_content \quad (S6)$$

$$n = 12, r = 0.732, F = 11.5, s = 7.2, p < 0.007$$

$$RSA(5') = 15.69 + 5.25(\pm 1.70) \cdot Sugar\_content \quad (S7)$$

$$n = 12, r = 0.698, F = 9.5, s = 8.6, p < 0.01$$

$$RSA(15') = 18.64 + 5.30(\pm 2.00) \cdot Sugar\_content \quad (S8)$$

$$n = 12, r = 0.642, F = 7.0, s = 10.1, p < 0.025$$

$$\bar{v}_1 = 1.14(\pm 0.40) + 0.221(\pm 0.030) \cdot Sugar\_content \quad (S9)$$

$$n = 12, r = 0.920, F = 54.8, s = 0.15, p < 0.00002$$

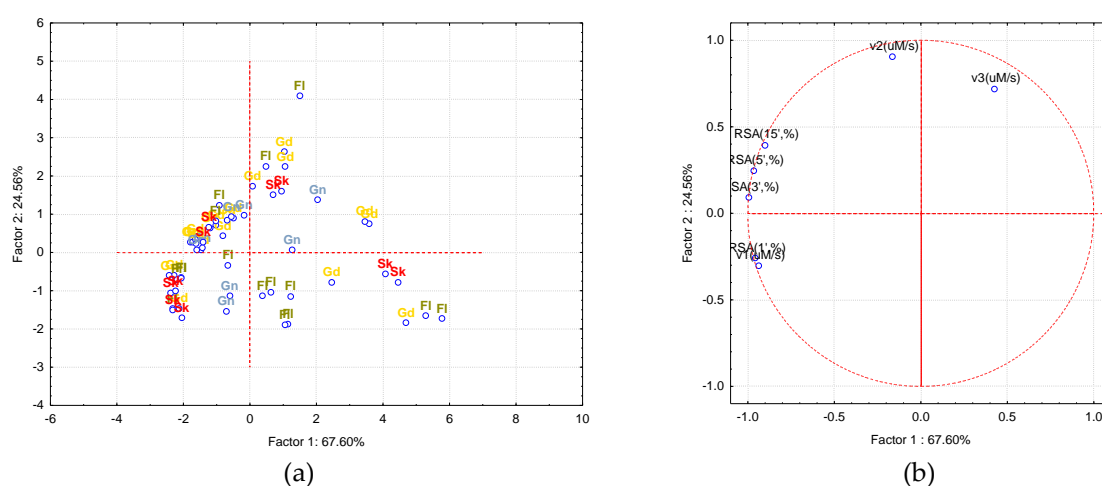

**Figure S10.** PCA results for the antioxidant activity and DPPH· kinetics data of all organic and non-organic apple extracts by variety (“Golden Delicious” – “Gd”, orange, “Florina” – “Fl”, green, “Generos” – “Gn”, turquoise, “Starkrimson” – “Sk”, red): (a)  $PC_2$  versus  $PC_1$  scores plot; (b)  $PC_2$  versus  $PC_1$  loadings plot.

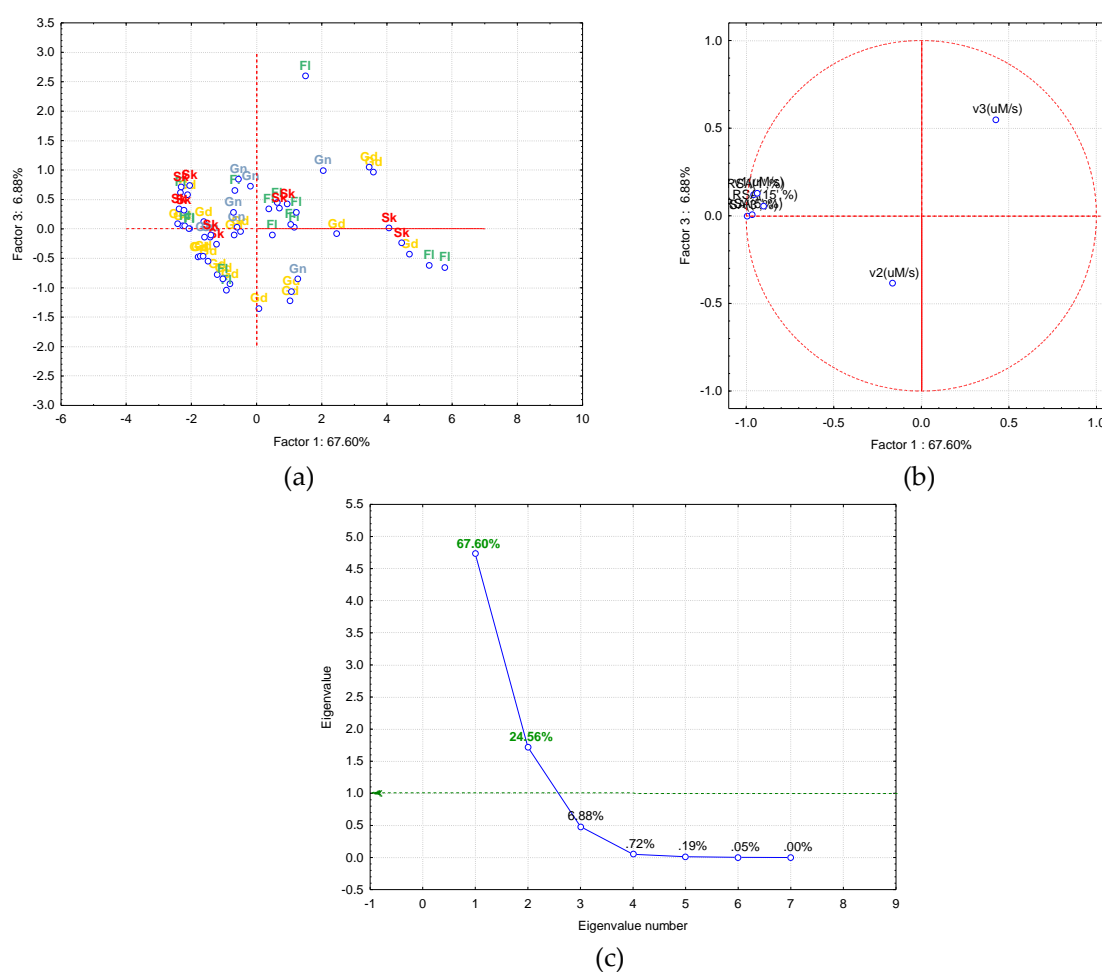

**Figure S11.** PCA results for the antioxidant activity and DPPH· kinetics data of all organic and non-organic apple extracts by variety (“Golden Delicious” – “Gd”, orange, “Florina” – “Fl”, green, “Generos” – “Gn”, turquoise, “Starkrimson” – “Sk”, red): (a)  $PC_3$  versus  $PC_1$  scores plot; (b)  $PC_3$  versus  $PC_1$  loadings plot; (c) eigenvalues of the correlation matrix.

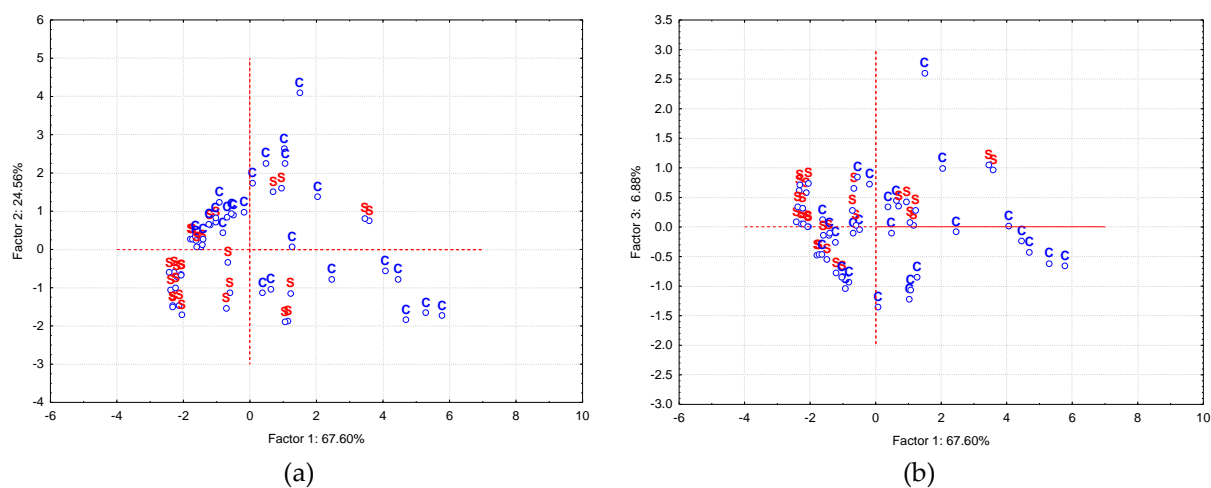

**Figure S12.** PCA results for the antioxidant activity and DPPH· kinetics data of all organic and non-organic apple extracts by the fruit part (shell – “S”, red, and core – “C”, blue): (a)  $PC_2$  versus  $PC_1$  scores plot; (b)  $PC_3$  versus  $PC_1$  scores plot.

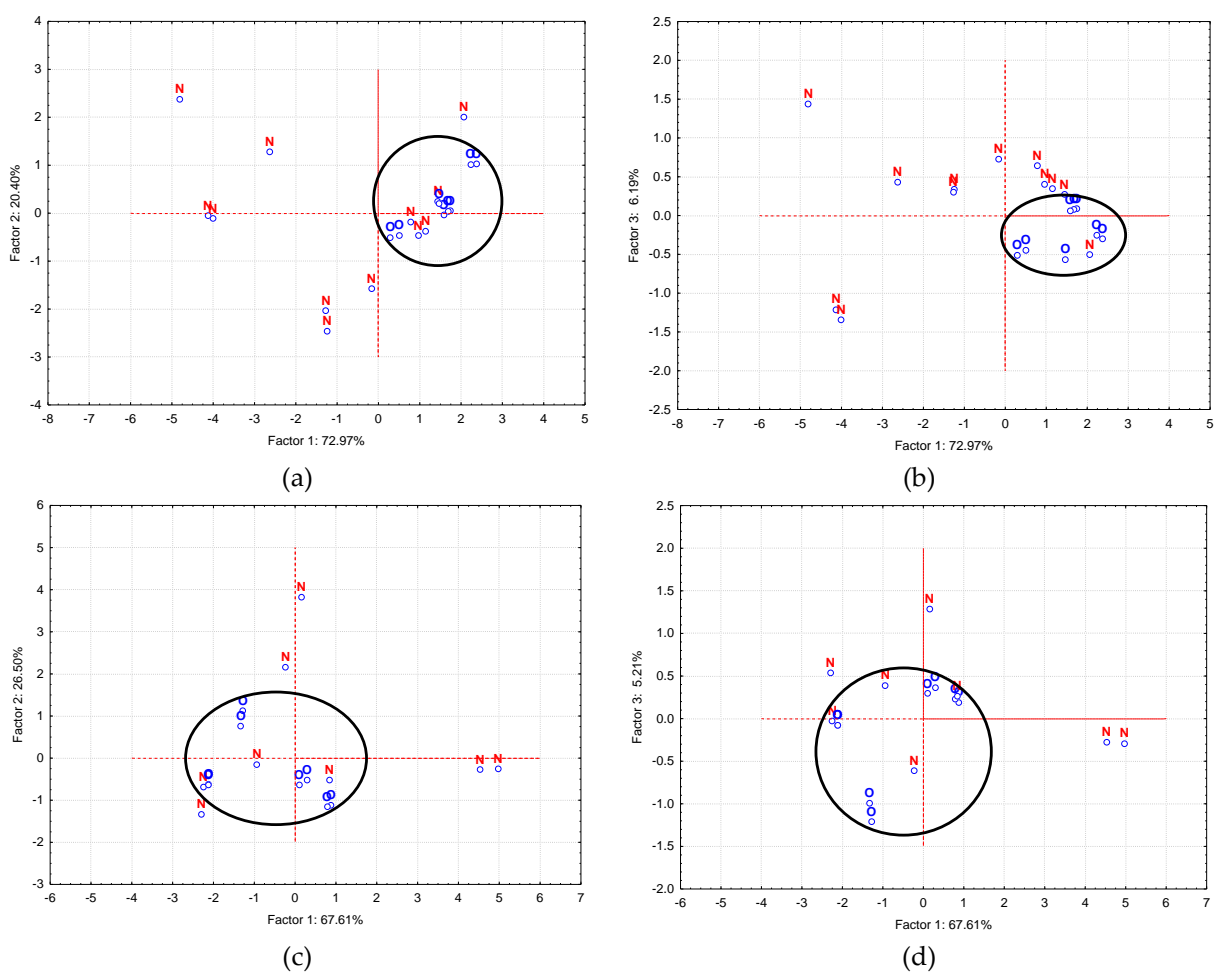

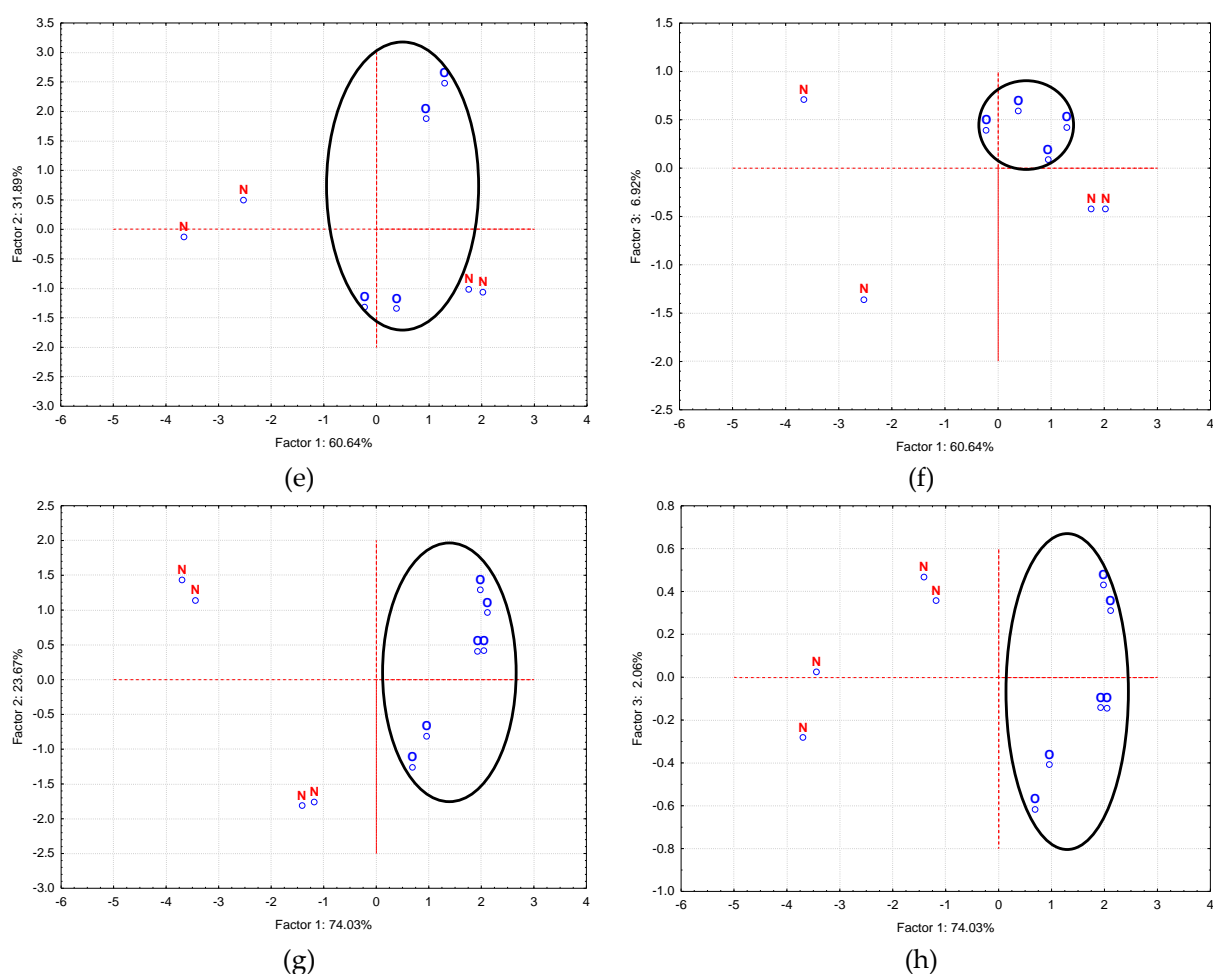

**Figure S13.** PCA results for the antioxidant activity and DPPH· kinetics data of organic (“O” - blue) and non-organic (“N” - red) apple extracts: (a)  $PC_2$  versus  $PC_1$  scores plot for “Golden Delicious” apple variety; (b)  $PC_3$  versus  $PC_1$  scores plot for “Golden Delicious” apple variety; (c)  $PC_2$  versus  $PC_1$  scores plot for “Florina” apple variety; (d)  $PC_3$  versus  $PC_1$  scores plot for “Florina” apple variety; (e)  $PC_2$  versus  $PC_1$  scores plot for “Generos” apple variety; (f)  $PC_3$  versus  $PC_1$  scores plot for “Generos” apple variety; (g)  $PC_2$  versus  $PC_1$  scores plot for “Starkrimson” apple variety; (h)  $PC_3$  versus  $PC_1$  scores plot for “Starkrimson” apple variety.

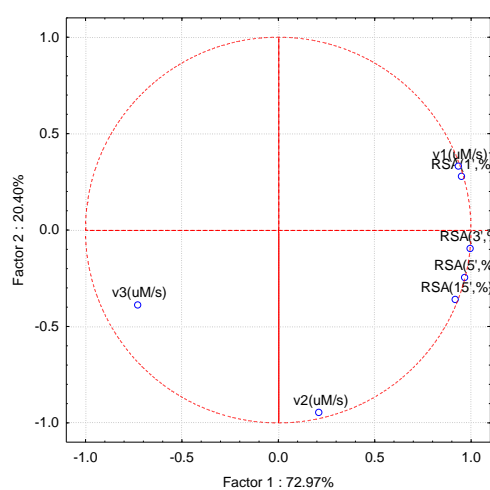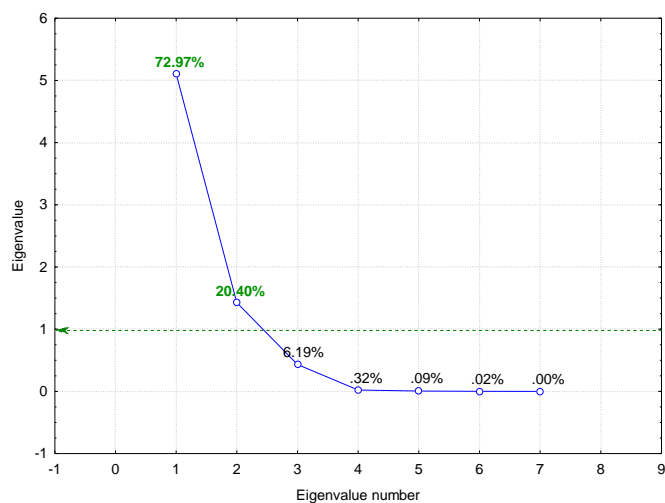

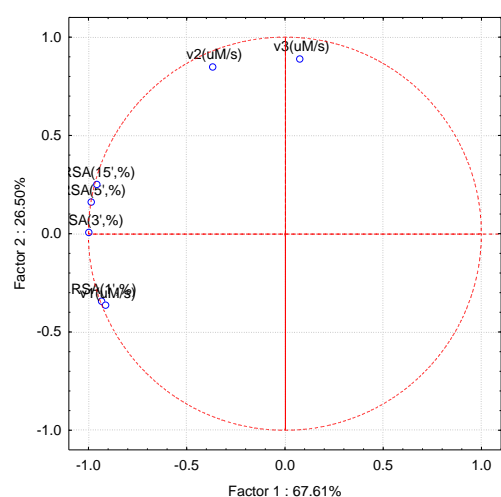

(c)

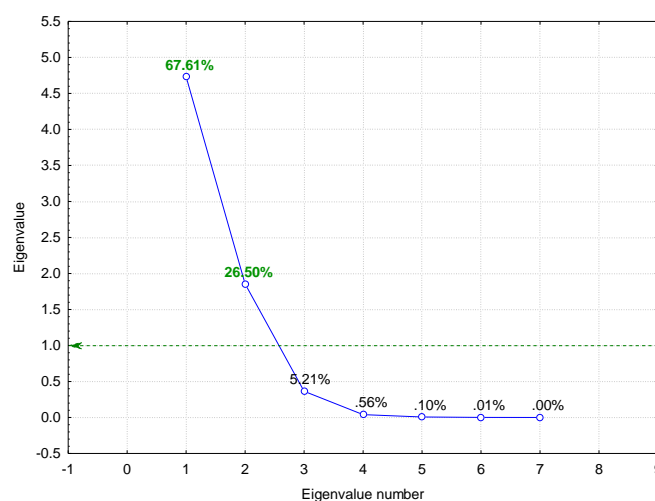

(d)

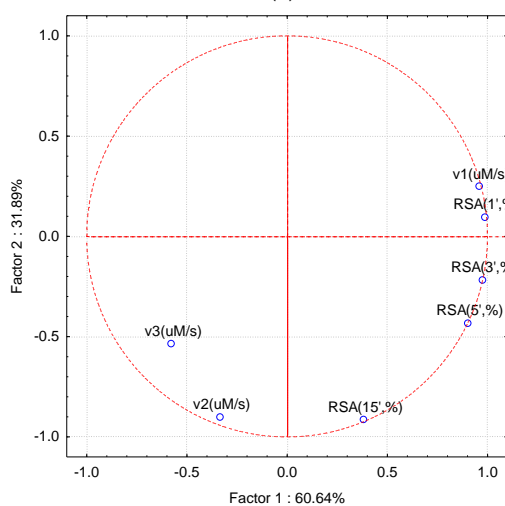

(e)

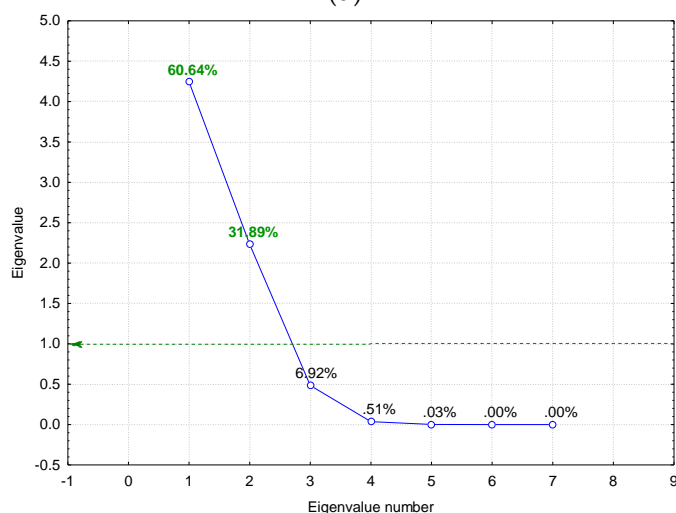

(f)

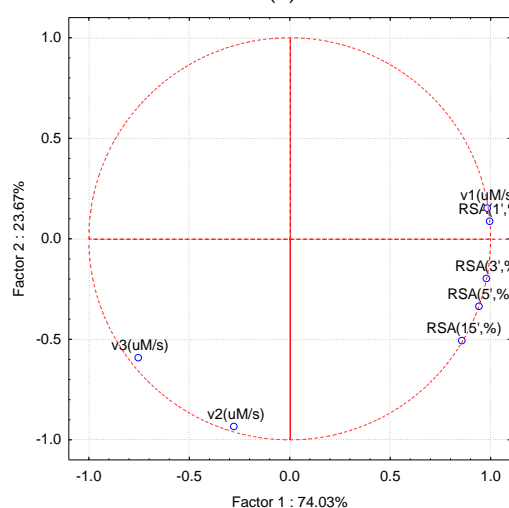

(g)

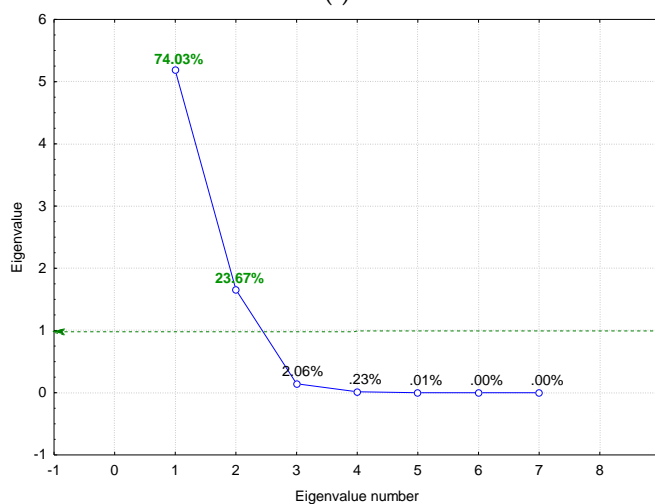

(h)

**Figure S14.** PCA results for the antioxidant activity and DPPH $\cdot$  kinetics data of organic and non-organic apple extracts: (a)  $PC_2$  versus  $PC_1$  loadings plot for "Golden Delicious" apple variety; (b) eigenvalues of the correlation matrix for "Golden Delicious" apple variety; (c)  $PC_2$  versus  $PC_1$  loadings plot for "Florina" apple variety; (d) eigenvalues of the correlation matrix for "Florina" apple variety; (e)  $PC_2$  versus  $PC_1$  loadings plot for "Generos" apple variety; (f) eigenvalues of the correlation matrix for "Generos" apple variety; (g)  $PC_2$  versus  $PC_1$  loadings plot for "Starkrimson" apple variety; (h) eigenvalues of the correlation matrix for "Starkrimson" apple variety.
